# Supplementary material
Source: PubMed Central journal article supplement (PMC6193457)
Supplement: NIHMS1507287-supplement-Supplement1.pdf [file NIHMS1507287-supplement-Supplement1.pdf]

## Supplementary Appendix

This appendix has been provided by the authors to give readers additional information about their work.

Supplement to: Francis PA, Pagani O, Fleming GF, et al. Tailoring adjuvant endocrine therapy for premenopausal breast cancer. *N Engl J Med* 2018;379:122-37. DOI: 10.1056/NEJMoa1803164

# Tailoring Adjuvant Endocrine Therapy for Premenopausal Breast Cancer

Francis, Pagani et al.

## SUPPLEMENTARY MATERIAL

### Contents

|                                                                                                                         |    |
|-------------------------------------------------------------------------------------------------------------------------|----|
| I. TEXT and SOFT Investigators and the International Breast Cancer Study Group Participants                             | 1  |
| II. Funding: Grant Support for Cooperative Groups .....                                                                 | 13 |
| III. Supplemental Methods, Figures and Tables .....                                                                     | 14 |
| III. A. Methods .....                                                                                                   | 14 |
| III. B. Efficacy of Ovarian Suppression in SOFT Figures and Tables.....                                                 | 18 |
| III. C. Efficacy of Exemestane Compared with Tamoxifen when Treated with Ovarian<br>Suppression Figures and Tables..... | 30 |
| III. D. Confidence Intervals for Targeted Adverse Events .....                                                          | 44 |
| III. E. SOFT + TEXT Combined Analysis and ABCSG-12.....                                                                 | 45 |

### I. TEXT and SOFT Investigators and the International Breast Cancer Study Group Participants

**Steering Committee:** P.A. Francis (Chair, SOFT Co-Chair), G.F. Fleming (SOFT Co-Chair), O. Pagani (TEXT Co-Chair), B. A. Walley (TEXT Co-Chair), M. Regan (Trial Statistician), L. Blacher, H. Bonnefoi, E. Ciruelos, A. Coates, M. Colleoni, A. Di Leo, R. Gelber, A. Goldhirsch, A. Hiltbrunner, R. Kammler, S. Loibl, R. Maibach, J. Martinez, M. Rabaglio-Poretti, B. Ruepp, K. Scott, H. Shaw, V. Stearns, R. Torrasi, K. Tryfonidis, G. Viale, V. Katkade (Pfizer) , J. Amauri Soares (Ipsen)

**IBCSG Scientific Committee:** M. Colleoni, A. Di Leo (Co-Chairs)

**IBCSG Scientific Executive Committee:** M. Colleoni, A. Di Leo, F. Boyle, G. Jerusalem, M. Regan, G. Viale

**IBCSG Foundation Council:** R. Stahl (President), S. Aebi, F. Boyle, A. Coates, M. Colleoni, A. DiLeo, R. Gelber, A. Goldhirsch, G. Jerusalem, P. Karlsson, I. Kössler, I. Láng

**IBCSG Coordinating Center, Bern, Switzerland:** A. Hiltbrunner (Director), S. Fournarakou, R. Kammler, R. Maibach, M. Rabaglio-Poretti, H. Roschitzki, S. Roux, B. Ruepp

**IBCSG Statistical Center, Dana-Farber Cancer Institute, Boston, MA, USA:** M. Regan (Director), M. Bonetti, Y. Feng, R. Gelber, A. Giobbie-Hurder, K. Gray, H. Huang, W. Luo, C. Mahoney, K. Price, L. Zickl

**IBCSG Data Management Center, Frontier Science & Technology Research Foundation, Amherst, NY, USA:** L. Blacher (Director), K. Scott (DM Section Head), M. Blackwell, A. Cesario, A. Dickinson, K. Donahue, M. Greco, P. Gonzalez, T. Heckman-Scolese, R. Hecker, R. Hinkle, M. Kalera, K. Lupejkis, A. Mora de Karausch, V. Palermo, H. Shaw, J. Swick-Jemison

**IBCSG Central Pathology Office, European Institute of Oncology, Division of Pathology, Milan, Italy:** G. Viale (Director), S. Andrighetto, O. Biasi, P. Dell'Orto, L. Russo

**IBCSG Quality of Life Office, Bern, Switzerland:** J. Bernhard, K. Ribi  
**Breast International Group (BIG),** Brussels, Belgium: M. Piccart-Gebhart, J. Martinez  
**U.S. National Cancer Institute:** J. Abrams, M. Mooney, J.A. Zujewski  
**U.S. NCI Clinical Trials Support Unit (CTSU)/Westat:** M. Hering, S. Pandit, O. Santos  
**Alliance (CALGB) Pathology Coordinating Office, Ohio State University, Columbus, OH, USA:** W. Frankel, D. Rohrer, S. Jewell  
**Alliance (CALGB) Pathology Coordinating Office, Alliance Biorepository at Ohio State, Ohio State University, Columbus, OH, USA:** W. Frankel, L. M. McCart, R. Jewell  
**Dana-Farber Cancer Institute, Boston, MA, USA (US FDA IND):** E. Winer, J Savoie  
**Pfizer Study Support:** C. Grant, L. Cisar, V. Katkade  
**Ipsen Study Support:** J. Amauri Soares

## **Participating Centers and Principal Investigators**

Centers with accrual of more than 1 patient

### **TEXT**

#### **BREAST INTERNATIONAL GROUP (BIG)**

##### **INTERNATIONAL BREAST CANCER STUDY GROUP (IBCSG)**

**Breast Cancer Trials Australia and New Zealand (BCT-ANZ), Australia;** P. Francis, I. Laycock  
Austin Health, Heidelberg, Victoria; J. Stewart  
Box Hill Hospital, Box Hill, Victoria; J. Chirgwin  
Calvary Mater Newcastle, Waratah, New South Wales; A. van der Westhuizen  
Coffs Harbour Health Campus, Coffs Harbour, New South Wales; K. Briscoe  
Fiona Stanley Hospital, Murdoch, Western Australia; A. Redfern  
Flinders Medical Centre, Bedford Park, South Australia; B. Koczwara  
Launceston General Hospital, Launceston, Tasmania; S. Gauden  
Liverpool Hospital, Liverpool, New South Wales; E. Moylan  
Macarthur Cancer Therapy Centre, Campbelltown, New South Wales; S. Della-Fiorentina  
Maroondah Hospital, Ringwood East, Victoria; J. Chirgwin  
Peter MacCallum Cancer Centre, East Melbourne, Victoria; P. A. Francis  
Royal Brisbane and Women's Hospital, Herston, Queensland; M. Nottage  
Royal Hobart Hospital, Hobart, Tasmania; D. Boadle  
St. Vincent's Hospital Melbourne, Fitzroy, Victoria; R. Snyder  
Tamworth Rural Referral Hospital, Tamworth, New South Wales; F. Sardelic  
Tweed Hospital, The, Tweed Heads, New South Wales; E. Abdi  
Victorian Breast and Oncology Care, East Melbourne, Victoria; M. Chipman

##### **Belgium**

Institute Jules Bordet, Brussels; A. Gombos  
Centre Hospitalier Peltzer-La Tourelle, Verviers; A. Barbeaux  
Centre Hospitalier Regional de la Citadelle, Liège; J. P. Salmon  
Centre Hospitalier Universitaire Sart Tilman, Liège; G. Jerusalem  
U.Z. Gasthuisberg, Leuven; P. Neven  
Centre Hospitalier Regional de Huy, Huy

##### **Egypt**

Cairo Oncology Centre, Cairo; H. Azim

##### **Hungary**

National Institute of Oncology, Budapest; I. Láng

**India**

Tata Memorial Hospital, Mumbai; V. Parmar

**Italy**

Dipartimento di Oncologia, Azienda Ospedaliero-Universitaria di Udine, Udine; F. Puglisi

Centro di Riferimento Oncologico, Aviano; S. Spazzapan

Fondazione Salvatore Maugeri, Pavia; L. Pavesi

Istituto Europeo di Oncologia, Milano; M. Colleoni

Ospedale degli Infermi, Rimini; L. Gianni

Ospedale di Circolo e Fondazione Macchi, Varese; G. Pinotti

Ospedali Riuniti di Bergamo, Bergamo; C. Tondini

Sandro Pitigliani Medical Oncology Unit, Hospital of Prato, Prato; A. Di Leo

Spedali Civili, Brescia; E. Simoncini

Unita Operativa de Medicina Oncologica, Ospedale Ramazzini, Carpi; A. Fabrizio

Azienda Sanitaria di Bolzano, Bolzano; C. Graiff

Istituto Clinico Humanitas, Rozzano; A. Santoro

**Peru**

Instituto de Enfermedades Neoplásicas, Lima; H. Gomez

**Slovenia**

Institute of Oncology, Ljubljana; E. Skof

**South Africa**

Sandton Oncology Centre, Johannesburg; D. Vorobiof

**Sweden**

Sahlgrenska University Hospital, Gothenburg; P. Karlsson

Linköping University Hospital, Linköping; B. Linderholm

**Swiss Association for Clinical Cancer Research (SAKK), Switzerland**

Centre Hospitalier Universitaire Vaudois, Lausanne; K. Zaman

Inselspital, Bern; M. Rabaglio

Oncocare Engeried, Bern; K. Buser

Institute of Oncology of Southern Switzerland (Ospedale San Giovanni, Bellinzona; Ospedale Regionale

di Lugano, (Civico & Italiano), Lugano; Ospedale Regionale Beata Vergine, Mendrisio; Ospedale

Regionale La Carità, Locarno; Istituto Cantonale di Patologia, Locarno); O. Pagani

Kantonsspital St. Gallen, St. Gallen; T. Ruhstaller

Rätisches Kantonos-/Regionalspital, Chur; R. von Moos

Kantonsspital Basel, Basel; C. Rochlitz

Onkologiezentrum Thun-Berner Oberland, Thun; D. Rauch

Zürich Frauenklinik, Zürich; N. Gabriel

**GERMAN BREAST GROUP (GBG); S. BUCHHOLZ, K. REIBMÜLLER, S. LOIBL G. VON MINCKWITZ**

Caritas-Krankenhaus St. Josef, Regensburg; S. Buchholz

Mammazentrum, Klinikum Deggendorf, Deggendorf; D. Augustin

St. Vincentius Kliniken Karlsruhe, Karlsruhe; O. Tomé

Dr. Horst Schmidt Kliniken, Wiesbaden; F. Lorenz-Salehi

Klinikum Mittelbaden, Baden-Baden; A. Hahn

Universitäts-Frauenklinik Lübeck, Lübeck; D. Lüdders

**ICR-CTSU ON BEHALF OF THE NATIONAL CANCER RESEARCH INSTITUTE (NCRI) BREAST CLINICAL STUDIES GROUP, UNITED KINGDOM; H. EARL, J. BLISS, A. GILLMAN, N. ATKINS**

Addenbrookes Hospital, Cambridge; H. Earl  
Peterborough District Hospital, Peterborough; K. McAdam

## **NORTH AMERICAN BREAST CANCER GROUP**

Alliance for Clinical Trials in Oncology; E. Winer, L. Carey, A. Partridge, M.P. Goetz  
ECOG-ACRIN Cancer Research Group; N. Davidson, V. Stearns, R.M. O'Regan, S. Gluck  
Canadian Cancer Trials Group; K.I. Pritchard, T. Whelan, K. Gelmon, M. Webster  
NRG Oncology; C.E. Geyer Jr., N. Wolmark, T Mamounas, J. White, S. Swain  
SWOG; G.N. Hortobagyi, S. Martino, J.R. Gralow, A.F. Scott

## **NORTH AMERICAN PARTICIPATING CENTERS**

### **Canada**

Cross Cancer Institute, Edmonton, Alberta; K.S. Tonkin  
Tom Baker Cancer Center, Calgary, Alberta; B.A. Walley (Chair), M. Webster (PI)  
London Regional Cancer Center, London, Ontario; K.R. Potvin  
Juravinski Cancer Centre at Hamilton Health Sciences, Hamilton, Ontario; R.G. Tozer  
Trillium Health Centre - W Toronto, Toronto, Ontario; J.A. Gapski  
Hôpital Charles LeMoyné, Greenfield Park, Quebec; C. Prady  
Allan Blair Cancer Center, Regina, Saskatchewan; M. Salim  
Saskatoon Cancer Center, Saskatoon, Saskatchewan; A. Sami  
The Vitalite Health Network - Dr. Leon Richard Oncology Centre, Moncton, New Brunswick; P. Whitlock  
Hopital du Sacre-Coeur de Montreal, Quebec; J. A. Roy  
Windsor Regional Cancer Centre, Ontario; C. Hamm

### **United States of America**

Presbyterian Hospital, Whittier, CA; J.H. Freimann  
University of California at San Diego, San Diego, CA; J.E. Mortimer  
San Francisco General, San Francisco, CA; H.S. Rugo  
University of California at San Francisco, San Francisco, CA; C.J. Ryan  
University of California San Diego Cancer Center, San Diego, CA; B.A. Parker  
University of Colorado, Aurora, CO; A.D. Elias  
The Shaw Regional Cancer Center, Aurora, CO; A.D. Elias  
University of Connecticut, Farmington, CT; S. Tannenbaum  
Walter Reed Army Medical Center, Washington, DC; D.C. Van Echo  
University of Miami Sylvester Cancer Center, Miami, FL; S. Gluck  
Mayo Clinic Jacksonville, Jacksonville, FL; E. Perez  
Siouxland Hematology - Oncology Associates, Sioux City, IA; D.B. Wender  
Saint Luke's Mountain States Tumor Institute, Boise, ID; T.A. Walters  
Evanston Northwestern Healthcare, Evanston, IL; D.E. Merkel  
John H. Stroger, Jr., Hospital of Cook County, Chicago, IL; H.A. Zaren  
Resurrection Medical Center, Chicago, IL; C. G. Rose  
University of Chicago, Chicago, IL; H.L. Kindler  
Saint Joseph's Medical Center, South Bend, IN; R.H. Ansari  
Memorial Hospital of South Bend, South Bend, IN; R.H. Ansari  
Fort Wayne Medical Oncology/Hematology Incorporated, Fort Wayne, IN; S.R. Nattam  
Northern Indiana Cancer Research Co, South Bend, IN; R.H. Ansari  
Mount Carmel Regional Cancer Center, Pittsburg, KS  
Stormont-Vail Regional Health Center, Topeka, KS; S.J. Vogel

Addison Gilbert, Gloucester, MA; A.P. McIntyre  
Tufts Medical Center, Boston, MA; J.K. Erban  
Massachusetts General Hospital, Boston, MA; H.J. Burstein  
Dana-Farber Cancer Institute, Boston, MA; H.J. Burstein  
Beth Israel Deaconess Medical Center, Boston, MA; H.J. Burstein  
Faulkner Hospital, Boston, MA; H.J. Burstein  
North Shore Cancer Center, Salem, MA; K.J. Krag  
Emerson Hospital, Boston, MA; H.J. Burstein  
Suburban Hospital, Bethesda, MD; C.B. Hendricks  
University of Maryland Greenebaum Cancer Center, Baltimore, MD; K.H. Rak Tkaczuk  
Mercy Medical Center, Baltimore, MD; D.A. Riseberg  
William Beaumont Hospital, Royal Oak, MI; D. Zakalik  
United Hospital, St. Paul, MN; P.J. Flynn  
Abbott-Northwestern Hospital, St. Louis Park, MN; P.J. Flynn  
Mercy Hospital, Coon Rapids, MN; P.J. Flynn  
Mayo Clinic, Rochester, MN; J.N. Ingle  
Saint John's Hospital - HealthEast, Minneapolis, MN; D.J. Schneider  
Metro-Minnesota CCOP, Minneapolis, MN; P.J. Flynn  
Washington School of Medicine, St Louis, MO; M.J. Naughton  
Kansas City CCOP, Kansas City, MO; W.T. Stephenson  
Montana Cancer Consortium CCOP, Billings, MT; B.T. Marchello  
Moses H. Cone Memorial, Greensboro, NC; J.E. Feldmann  
Mission Hospitals Inc, Asheville, NC; M.J. Messino  
Hope, A Women's Cancer Center, Asheville, NC; D.J. Hetzel  
Medcenter One Health Systems, Bismarck, ND; E.J. Wos  
Dakota Clinic, Fargo, ND; K. Sen  
University of Nebraska Medical Center, Omaha, NE; E.C. Reed  
Portsmouth Regional Hospital, Portsmouth, NH; E.M. Bonnem  
South Jersey Healthcare, Vineland, NJ; D.H. Blom  
Virtua West Jersey Hospitals, Marlton, NJ; M.S. Entmacher  
New York University Medical Center, New York, NY; A.D. Tiersten  
Albert Einstein College/Medicine, Bronx, NY; C.M. Pellegrino  
Roswell Park Cancer Institute, Buffalo, NY; E.G. Levine  
Aultman Hospital, Canton, OH; J.A. Schmotzer  
Geisinger Medical Center, Danville, PA; G.D.A. Padula  
Sioux Valley Clinic - Oncology, Sioux Falls, SD; M.A. Mazurczak  
University of Vermont, Burlington, VT; S. Burdette-Radoux  
Mountainview Medical, Berlin, VT; S. Burdette-Radoux  
Swedish Hospital Medical Center, Seattle, WA; S.E. Rivkin  
University of Washington Medical Center, Seattle, WA; S.E. Rivkin  
Aspirus Wausau Hospital Center, Wausau, WI; U. Gautam  
Oncology Alliance-Glendale, Glendale, WI; R.D. Hart  
West Virginia University, Morgantown, WV; J. Abraham

## **SOFT**

### **BREAST INTERNATIONAL GROUP (BIG)**

### **INTERNATIONAL BREAST CANCER STUDY GROUP (IBCSG)**

**Breast Cancer Trials Australia and New Zealand (BCT-ANZ), Australia;** P. Francis, I. Laycock

Austin Health, Heidelberg, Victoria; J. Stewart  
Ballarat Oncology and Haematology Services, Wendouree, Victoria; G. Kannourakis  
Border Medical Oncology, Wodonga, Victoria; C. Underhill  
Calvary Mater Newcastle, Waratah, New South Wales; A. van der Westhuizen  
Canberra Hospital, The, Garran, Australian Capital Territory; N. Gorddard  
Chris O'Brien Lifehouse, The, Canperdown, New South Wales; J. Beith  
Coffs Harbour Health Campus, Coffs Harbour, New South Wales; K. Briscoe  
Concord Repatriation General Hospital, Concord, New South Wales; P. Beale  
Launceston General Hospital, Launceston, Tasmania; S. Gauden  
Liverpool Hospital, Liverpool, New South Wales; E. Moylan  
Macarthur Cancer Therapy Centre, Campbelltown, New South Wales; S. Della-Fiorentina  
Manning Rural Referral Hospital, Taree, New South Wales; E. Livshin  
Maroondah Hospital, Ringwood East, Victoria; J. Chirgwin  
Mater Hospital, The, North Sydney, New South Wales; F. Boyle  
Monash Medical Centre, East Bentleigh, Victoria; M. White  
Nambour Hospital, Nambour, Queensland; G. Hawson  
Peter MacCallum Cancer Center, East Melbourne, Victoria; P.A. Francis  
Riverina Cancer Care Centre, Wagga Wagga, New South Wales; J. Hill  
Royal Adelaide Hospital, Adelaide, South Australia; P. G. Gill  
Royal Brisbane and Women's Hospital, Herston, Queensland; M. Nottage  
Royal Hobart Hospital, Hobart, Tasmania; D. Boadle  
Royal North Shore Hospital, St. Leonards, New South Wales; S. Baron-Hay  
St. Andrews Toowoomba Hospital, Toowoomba, Queensland; P. Vasey  
St. George Hospital, Kogarah, New South Wales; J. Lynch  
St. John of God Hospital, Bunbury, Western Australia; A. Kiberu  
St. John of God Hospital, Subiaco, Western Australia; D. Tsoi  
St. Vincents Hospital, Fitzroy, Victoria; R. Snyder  
St. Vincent's Hospital, Darlinghurst, New South Wales; R. Epstein  
Tweed Hospital, The, Tweed Heads, New South Wales; E. Abdi  
Victorian Breast and Oncology Care, Melbourne, Victoria; M. Chipman

**Breast Cancer Trials Australia and New Zealand (BCT-ANZ), New Zealand**

Auckland City Hospital, Auckland; S. Wilson  
Christchurch Hospital, Christchurch; K. Gardner  
Waikato Hospital, Hamilton; I. Campbell

**Brazil**

Hospital de Clinicas de Porto Alegre, Porto Alegre; J. Villanova Biazús

**Grupo Oncológico Corporativo Chileno de Investigación (GOCCHI), Chile; A. Corvalan, B. Muller**

Instituto Nacional del Cancer, Santiago; R. Torres  
Hospital San Juan de Dios, Santiago; S. Torres  
Hospital San Borja Arriaran, Santiago; J. Letzkus  
Hospital Clinico de la Universidad de Chile, Santiago; O. Barajas  
Hospital Dr. Sotero Del Rio, Santiago; H. Rojas  
Centro De Patologia Mamaria, Santiago; M.E. Bravo  
Hospital Base de Valdivia, Valdivia; B. Cardemil  
Instituto De Radiomedicina, Vitacura; R. Baeza

**Hungary**

National Institute of Oncology, Budapest; I. Láng

**India**

Tata Memorial Hospital, Mumbai; V. Parmar

**Italy**

Centro di Riferimento Oncologico, Aviano; S. Spazzapan

Azienda Sanitaria di Bolzano, Bolzano; C. Graiff

Ospedali Riuniti di Bergamo, Bergamo; C. Tondini

Ospedale degli Infermi, Biella; M. Clerico

Unita Operativa de Medicina Oncologica, Ospedale Ramazzini, Carpi; A. Fabrizio

Oncologia Medica Fano Italy, Fano; R. Mattioli

Ospedale Civile di Lecco, Lecco; M. Visini

Fondazione Salvatore Maugeri, Pavia; L. Pavesi

Ospedale degli Infermi, Rimini; L. Gianni

Ospedale di Circolo e Fondazione Macchi, Varese; G. Pinotti

Dipartimento di Oncologia, Azienda Ospedaliero-Universitaria di Udine, Udine; F. Puglisi

**Peru**

Instituto de Enfermedades Neoplásicas, Lima; H.L. Gomez

**South Africa**

Sandton Oncology Centre, Johannesburg; D. Vorobiof

**Sweden**

Sahlgrenska University Hospital, Gothenburg; P. Karlsson

Central Hospital Karlstad, Karlstad; B. Loden

Karolinska University Hospital, Stockholm; J. Bergh

Lund University Hospital, Lund; P. Malmström

Skaraborg Hospital Skovde, Skovde; A. Nissborg

Southern Elfsborg Hospital Boras, Boras; P. Karlsson

**Swiss Association for Clinical Cancer Research (SAKK), Switzerland**

Centre Hospitalier Universitaire Vaudois, Lausanne; K. Zaman

Inselspital, Berne; M. Rabaglio

Kantonsspital St. Gallen, St. Gallen; T. Ruhstaller

Rätisches Kantonos-/Regionalspital, Chur; R. von Moos

Kantonsspital Basel, Basel; C. Rochlitz

Onkologiezentrum Thun-Berner Oberland, Thun; D. Rauch

Oncocare Engeried, Bern; K. Buser

Zürich Frauenklinik, Zürich; N. Gabriel

Brust-Zentrum Zurich, Zurich; C. Rageth

Kantonsspital Aarau (AG), Aarau; A. Schoenenberger

Tumor Zentrum Hirslanden Klinik, Aarau; R. Popescu

Kantonsspital Baden, Baden; C. Caspar

Tumor und Brustzentrum Zetup St. Gallen, St. Gallen; H.J. Senn

**SOLTI, SPAIN; E. CIRUELOS**

Hospital Clinic i Provincial de Barcelona , Barcelona; M. Muñoz

Hospital Universitari Vall D' Hebron, Barcelona; M. Bellet

Hospital Universitario 12 de Octubre, Madrid; E. Ciruelos

Centro Oncologico MD Anderson, Madrid; A. González Martín

Hospital Son Llatzer, Palma de Mallorca; J. G. Catalán

Clinica Univ. De Navarra, Pamplona; J. M. Aramendia

Instituto Valenciano de Oncologia, Valencia; M.A. Climent

Hospital Son Dureta (Palma de Mallorca), Palma de Mallorca; J. Rifà



Hospital Santiago De Compostela, Santiago de Compostela; R. López  
H.U. Arnau de Vilanova, Lleida; A. Llombart  
Hospital Universitario Virgen Macarena, Sevilla; J.A. Virizuela  
Hospital Clinico Universitario de Valencia, Valencia; A. Lluch  
Hospital Ramon Y Cajal, Madrid; N. Martinez Jañez  
Hospital Sant Joan de Reus, Reus; M. Melé  
Hospital Reina Sofia De Cordoba, Cordoba; J.R. de la Haba  
Hospital Dr Negrin, Las Palmas de Gran Canari; Negrin; U. Bohn  
Hospital Sant Pau i Santa Tecla, Tecla; C. Pérez Segura

**CENTRAL AND EAST EUROPEAN ONCOLOGY GROUP (CEEEOG); J. JASSEM**

**Poland**

Medical University of Gdansk, Gdansk, Poland; J. Jassem

**Serbia**

Institute of Oncology & Radiology of Serbia, Belgrade, Serbia; Z. Neskovic-Konstantinovic

**EUROPEAN ORGANISATION FOR RESEARCH AND TREATMENT OF CANCER (EORTC) ; N. DIF,  
J. BOGAERTS, K. TRYFONIDIS**

**Belgium**

ZNA Middelheim, Antwerpen; A. Vandebroek  
Cliniques Universitaires St-Luc UCL, Brussels; M. Berliere  
U.Z. Gasthuisberg, Leuven; P. Neven  
Centre Hospitalier Universitaire Sart Tilman, Liège; G. Jerusalem  
Hopital De Jolimont, Haine St. Paul; C. Mitine  
Clinique Sainte Elisabeth, Namur; P. Vuylsteke  
Algemeen Ziekenhuis Sint-Augustinus, Wilrijk; L. Dirix

**France**

Centre Henri Becquerel, Rouen; C. Moldovan  
Institut Claudius Regaud, Toulouse; B. de Lafontan  
Institut Jean Godinot, Reims; C. Jouannaud  
Centre Leon Berard, Lyon; T. Bachelot  
Institut Bergonie, Bordeaux; H. Bonnefoi  
Centre Georges Francois-Leclerc, Dijon; I. Desmoulins  
Centre Rene Huguenin, Saint-Cloud; E. Brain  
Institut Curie, Paris; J.Y. Pierga  
Centre Eugene Marquis, Rennes; P. Kerbrat  
C.H.R.U. de Limoges, Limoges; N. Tubiana-Mathieu  
Clinique Mutualiste de l'Estuaire, Saint-Nazaire; V. Delecroix  
Clinique De L'alliance, Tours; A. Fignon  
Institut Gustave Roussy, Villejuif; M. Saghatchian

**Israel**

Rambam Medical Center, Haifa; G. Fried

**Netherlands**

The Netherlands Cancer Institute, Amsterdam; S. Sonke  
Onze Lieve Vrouwe Gasthuis, Amsterdam; O. Leeksa  
Leids Universitair Medisch Centrum, Leiden; J. Kroep

**Portugal**

Centro de Lisboa, Lisboa; A. Moreira

**Turkey**

Marmara University Hospital, Istanbul; F. Dane

**GERMAN BREAST GROUP (GBG); S. BUCHHOLZ, K. REIBMÜLLER, S. LOIBL G. VON MINCKWITZ**

DRK Kliniken Berlin Köpenick, Berlin; A. Kleine-Tebbe  
Praxis Dr. Tessen, Goslar; H.W. Tessen  
Martin-Luther-Universität Halle-Wittenberg, Halle an der Saale; C. Thomssen  
Universitätsfrauenklinik Erlangen, Erlangen; M.W. Beckmann  
Klinikum Mittelbaden/Stadtklinik Baden-Baden, Baden-Baden; A. Hahn  
Dr. Horst Schmidt Kliniken, Wiesbaden; F. Lorenz-Salehi  
St. Vincentius Kliniken, Karlsruhe; O. Tomé  
Klinikum Landshut GmbH, Landshut; I. Bauerfeind  
Universitäts Frauenklinik, Frankfurt/Main; B. Schnappauf  
Caritas-Krankenhaus St. Josef, Regensburg; S. Buchholz  
Krankenhaus der Barmherzigen Brüder, Regensburg; H. Stauder

**CANCER TRIALS IRELAND (FORMERLY ALL IRELAND COOPERATIVE ONCOLOGY RESEARCH GROUP; ICORG)**

Beaumont Hospital, Dublin; L. Grogan  
Mater Misericordiae Hospital, Dublin; J. McCaffrey  
Mater Private Hospital, Dublin; J. McCaffrey  
Univiversity College Hospital Galway, Galway; M. Keane  
South Infirmary-Victoria University Hospital, Cork; S. O'Reilly  
Adelaide, Meath & National Children's Hospital, Dublin; J. Walshe

**ICR-CTSU ON BEHALF OF THE NATIONAL CANCER RESEARCH INSTITUTE (NCRI) BREAST CLINICAL STUDIES GROUP, UNITED KINGDOM; R. COLEMAN, J. BLISS, A. GILLMAN, N. ATKINS**

South Tyneside District Hospital, South Shields, Tyne & Wear; G. Mazdai  
Weston Park Hospital, Sheffield, South Yorkshire; R. Coleman  
Mount Vernon Hospital, Northwood, Middlesex; A. Makris  
Luton & Dunstable Hospital, Luton; A. Makris  
Clatterbridge Centre for Oncology, Wirral; S. O'Reilly  
Great Western Hospital, Swindon; D. Cole  
New Cross Hospital, Wolverhampton; M Churn  
Whiston Hospital, Prescot; H. Ines  
Aberdeen Royal Infirmary, Aberdeen; R. Todd  
Royal Marsden Hospital - Fulham, London; I.E. Smith  
Royal Marsden Hospital - Sutton, Surrey; I.E. Smith  
York Hospital, York; J. Joji  
St. James Univ Hospital, Leeds; T. Perren  
Harrogate District Hospital, Harrogate; J. Joji  
Stepping Hill Hospital, Stockport; A. Chittalia  
Russells Hall Hospital, Dudley; P. Ramachanara

**NORTH AMERICAN BREAST CANCER GROUP**

Alliance for Clinical Trials in Oncology; E. Winer, L. Carey, A. Partridge, J.N. Ingle

ECOG-ACRIN Cancer Research Group); N. Davidson, V. Stearns, R.M. O'Regan, S. Gluck  
Canadian Cancer Trials Group; K.I. Pritchard, T. Whelan, K. Gelmon, M. Webster

NRG Oncology; C.E. Geyer Jr., N. Wolmark, T Mamounas, J. White, S. Swain  
SWOG; G.N. Hortobagyi, S. Martino, J.R. Gralow, A.F. Scott

## **NORTH AMERICAN PARTICIPATING CENTERS**

### **Canada**

Doctor H. Bliss Murphy Cancer Center, St. John's, Newfoundland; J.S. McCarthy  
BCCA-Vancouver Cancer Center, Vancouver, British Columbia; H. Kennecke  
CHUM- Hotel Dieu du Montreal, Montreal, Quebec; A. Robidoux  
Hopital Du Sacre-Coeur de Montreal, Montreal, Quebec; J.A. Roy  
Hôpital Charles LeMoynes, Greenfield Park, Quebec; C. Prady  
Cancer Centre of Southeastern Ontario at Kingston General Hospital, Kingston, Ontario; V. Kumar  
Ottawa Hospital Research Institute, Ottawa, Ontario; S.F. Dent  
Thunder Bay Regional Health Science Centre, Thunder Bay, Ontario; D. Vergidis  
Health Sciences North, , Sudbury, Ontario; P.G. Lopez  
Juravinski Cancer Centre at Hamilton Health Sciences, Hamilton, Ontario; R. G. Tozer  
Odette Cancer Centre, Toronto, Ontario; K.I. Pritchard  
London Regional Cancer Center, London, Ontario; K.R. Potvin  
Cancercare Manitoba, Winnipeg, Manitoba; D. Grenier  
Cross Cancer Institute, Edmonton, Alberta; K.S. Tonkin  
Tom Baker Cancer Center, Calgary, Alberta; B.A. Walley (Chair), M. Webster (PI)  
BCCA Cancer Center for the Southern Interior, Kelowna, British Columbia; S. Ellard  
BCCA-Fraser Valley Cancer Center, Surrey, British Columbia; G. K. Pansegrau  
Allan Blair Cancer Centre, Regina, Saskatchewan; M. Salim

### **United States of America**

Providence Alaska Medical Center, Anchorage, AK; J.E. Anderson  
University of Alabama, Birmingham, AL; R. Diasio  
University of California at Los Angeles (UCLA), Los Angeles, CA; P.A. Ganz  
University of Southern California, Los Angeles, CA; C.A. Russel  
Scripps Clinic - La Jolla, La Jolla, CA; J.F. Kroener  
University of California San Diego Moores Cancer Center, San Diego, CA; B.A. Parker  
John Muir Medical Center, Concord, CA; J.T. Ganey  
Kaiser Permanente - Fremont, Fremont, CA; L. Fehrenbacher  
Alta Bates Hospital, Berkeley, CA; D.H. Irwin  
Kaiser Permanente Santa Teresa (San Jose), Vallejo, CA; L. Fehrenbacher  
Mercy General Hospital, Carmichael, CA; M. Javeed  
Kaiser Permanente-San Francisco, Vallejo, CA; L. Fehrenbacher  
Santa Rosa Memorial Hospital, Santa Rosa, CA; I.C. Anderson  
Stanford University Medical Center, Stanford, CA; I.L. Wapnir  
Kaiser Permanente, San Diego, CA; J.A. Polikoff  
Glendale Memorial Hospital and Health Center, Glendale, CA; G. Al-Jazayrly  
Penrose-Saint Francis Healthcare, Colorado Springs, CO; E.R. Pajon  
Front Range Cancer Specialists, Fort Collins, CO; D. Medgyesy  
Longmont United Hospital, Longmont, CO; E.R. Pajon  
The Shaw Regional Cancer Center, Aurora, CO; A.D. Elias

Greenwich Hospital, Greenwich, CT; B.J. Drucker  
Norwalk Hospital, Norwalk, CT; R.C. Frank  
Stamford Hospital, Stamford, CT; I. Tepler  
Eastern Connecticut Hematology and Oncology Associates, Norwich, CT; K. Jagathambal  
Northwest Connecticut Oncology - Hematology Associates, Torrington, CT; D.S. Brandt  
Georgetown University Hospital, Washington, DC; C. Isaacs  
Washington Hospital Center, Washington, DC; A. Aggarwal  
Sibley Memorial Hospital, Washington, DC; F. Barr  
Christiana Healthcare Services - Christian Hospital, Newark, DE; D.D. Biggs  
Memorial Cancer Institute, Hollywood, FL  
Mount Sinai Medical Center CCOP, Miami Beach, FL; M.A. Schwartz  
Holy Cross Hospital, Fort Lauderdale, FL; R.C. Lilenbaum  
Sarasota Memorial Hospital, Sarasota, FL  
DeKalb Medical Center, Atlanta, GA; T.E. Seay  
Emory University, Atlanta, GA; R.M. O'Regan  
Memorial Health University Medical Center, Savannah, GA; H.C. Lebos  
Atlanta Regional CCOP, Atlanta, GA; T.E. Seay  
Augusta Oncology Associates, Inc., Augusta, GA; M.R. Keaton  
St. Joseph's/Candler Health System, Savannah, GA; M.A. Taylor  
Mercy Medical Center - North Iowa, Mason City, IA; W.W. Bate  
Medical Associates Clinic, Professional Corporation, Dubuque, IA; C. Holm  
Loyola University Medical Center, Maywood, IL; K.S. Albain  
Rush University Medical Center, Chicago, IL; M.A. Cobleigh  
University of Chicago, Chicago, IL; H.L. Kindler  
St. Anthony Medical Center, Rockford, IL; R.E. Nora  
Decatur Memorial Hospital, Decatur, IL; J.L. Wade  
Memorial Medical Center, Springfield, IL; J.L. Wade  
Ingalls Memorial Hospital, Harvey, IL; M.F. Kozloff  
Carle Cancer Center CCOP, Urbana, IL; K.M. Rowland  
Community Regional Cancer Care North, Indianapolis, IN; R. Walling  
Indiana University Medical Center, Indianapolis, IN; K.D. Miller  
Fort Wayne Medical Oncology/Hematology Incorporated, Fort Wayne, IN; S.R. Nattam  
Northern Indiana Consortium, South Bend, IN; R.H. Ansari  
Cancer Center of Kansas - Wichita, Wichita, KS; S.R. Dakhil  
Via Christi Regional Medical Center, Wichita, KS; S.R. Dakhil  
Louisiana State University, Shreveport, LA; G.M. Mills  
Tufts Medical Center, Boston, MA; J.K. Erban  
Massachusetts General Hospital, Boston, MA; H.J. Burstein  
Dana-Farber Cancer Institute, Boston, MA; H.J. Burstein  
Beth Israel Deaconess Medical Center, Boston, MA; H.J. Burstein  
North Shore Cancer Center, Salem, MA; K.J. Krag  
Suburban Hospital, Bethesda, MD; C.B. Hendricks  
Johns Hopkins University, Baltimore, MD; A.C. Wolff  
Anne Arundel Medical Center, Annapolis, MD; S.P. Watkins  
Kaiser Permanente - Shady Grove Medical Center, Rockville, MD; L.C. Hwang  
Eastern Maine Medical Center, Bangor, ME; H.M. Segal  
Mercy Hospital, Portland, ME; R.C. Inhorn  
William Beaumont Hospital, Royal Oak, MI; D. Zakalik  
University of Michigan Medical Center, Ann Arbor, MI; A.F. Schott

Wayne State University, Detroit, MI; R.T. Morris  
Mid-Michigan Medical Center, Midland, MI; M.R. Hurtubise  
Regions Hospital, Minneapolis, MN; D.J. Schneider  
United Hospital, St. Paul, MN; P.J. Flynn  
Duluth Clinic, Duluth, MN; R.J. Dalton  
Mayo Clinic, Rochester, MN; J.N. Ingle  
Saint Francis Regional Medical Center, Shakopee, MN; D.J. Schneider  
Washington University School of Medicine, St Louis, MO; M.J. Naughton  
Saint John's Regional Health Center, Springfield, MO; J.W. Goodwin  
Missouri Baptist Medical Center, Saint Louis, MO; A.P. Lyss  
Montana Cancer Consortium CCOP, Billings, MT; B.T. Marchello  
University of North Carolina, Chapel Hill, NC; T.C. Shea  
Mission Hospitals Inc, Asheville, NC; M.J. Messino  
Forsyth Memorial Hospital, Winston-Salem, NC; J.O. Hopkins  
Northeast Medical Center, Concord, NC; J.G. Wall  
Hope, A Women's Cancer Center, Asheville, NC; D.J. Hertzell  
Altru Hospital, Grand Forks, ND; T. Dentchev  
Elliot Hospital, Manchester, NH; D. Weckstein  
Dartmouth Hitchcock Medical Center, Lebanon, NH; P.A. Kaufman  
New Hampshire Oncology-Hematology Associates, Concord, NH; C. Catcher  
Saint Barnabas Medical Center, Livingston, NJ; R.A. Michaelson  
Cooper Hospital University Medical Center, Newark, NJ; D.D. Biggs  
Cancer Institute of New Jersey, New Brunswick, NJ; D.L. Toppmeyer  
Cancer Institute of New Jersey At Hamilton, Trenton, NJ; D.L. Toppmeyer  
University of Nevada At Reno Washoe Medical Center, Reno, NV  
Saint Vincent's Hospital and Medical Center of New York, New York, NY; P. Klein  
Memorial Sloan Kettering Cancer Center, New York, NY; C.A. Hudis  
Weill Medical College of Cornell University, New York, NY; J. Leonard  
Staten Island University Hospital, Staten Island, NY; M. Odaimi  
Albert Einstein College/Medicine, Bronx, NY; C.M. Pellegrino  
Montefiore Medical Center, Bronx, NY; C.M. Pellegrino  
North Shore University Hospital, Manhasset, NY; D.R. Budman  
Brookdale Hospital Medical Center, Brooklyn, NY; M.R. Kalavar  
Roswell Park Cancer Institute, Buffalo, NY; E.G. Levine  
Ohio State University Hospital, Columbus, OH; C.D. Bloomfield  
Cleveland Clinic Foundation, Cleveland, OH; G.T. Budd  
Case Western Reserve University, Cleveland, OH; P. Silverman  
Fairview Hospital, Cleveland, OH; G.T. Budd  
Aultman Hospital, Canton, OH; J.A. Schmotzer  
Samaritan North Health Center, Dayton, OH; H.M. Gross  
Lima Memorial Hospital, Toledo, OH; P.L. Schaefer  
Cleveland Clinic Wooster Specialty Center, Wooster, OH; G.T. Budd  
Kaiser Permanente, Portland, OR; N.R. Tirumali  
Allegheny Cancer Center Network, Pittsburgh, PA; N. Wolmark  
University of Pittsburgh, Pittsburgh, PA; A.M. Brufsky  
Lancaster General Hospital, Lancaster, PA; R.J. Gottlieb  
Abramson Cancer Center of the University of Pennsylvania, Philadelphia, PA; S.M. Domchek  
Fox Chase Cancer Center, Philadelphia, PA; L.J. Goldstein  
Chester County Hospital, West Chester, PA; W.E. Luginbuhl

St. Mary Regional Cancer Center, Langhorne, PA; R.E. Reilly  
Abington Memorial Hospital, Abington, PA; W.G. Andrews  
Scranton Hematology Oncology, Scranton, PA; M. Hyzinski  
Rhode Island Hospital, Providence, RI; W.M. Sikov  
Women's and Infants Hospital, Providence, RI; D.S. Dizon  
Sioux Valley Clinic - Oncology, Sioux Falls, SD; M.A. Mazurczak  
Erlanger Medical Center, Chattanooga, TN; L.L. Schlabach  
Jones Clinic, Germantown, TN; B.A. Mullins  
Presbyterian Hospital of Dallas, Dallas, TX; J.F. Strauss  
M.D. Anderson Cancer Center, Houston, TX; M.C. Green  
Baylor College of Medicine, Houston, TX; R.M. Elledge  
Doctor's Hospital of Laredo, Laredo, TX; G.W. Unzeitig  
University of Vermont, Burlington, VT; S. Burdette-Radoux  
Swedish Hospital Medical Center, Seattle, WA; S.E. Rivkin  
University of Washington Medical Center, Seattle, WA; S.E. Rivkin  
Southwest Washington Medical Center, Vancouver, WA; K.S. Lanier  
University of Wisconsin, Madison, WI; J.A. Stewart  
Saint Vincent Hospital, Green Bay, WI; T.J. Saphner  
Midelfort Clinic, Eau Claire, WI; G.S. Nambudiri  
Green Bay Oncology LTD at Saint Mary's Hospital, Green Bay, WI; T.J. Saphner  
Marshall University Medical Center, Huntington, WV; M.R.B. Tria Tirona

## **II. Funding: Grant Support for Cooperative Groups**

**Breast Cancer Trials Australia and New Zealand** [National Health and Medical Research Council grant numbers 351161, 510788 and 1105058];

**Institute of Cancer Research Clinical Trials and Statistics Unit (ICR-CTSU)** on behalf of the National Cancer Research Institute Breast Clinical Studies Group United Kingdom (NCRI-BCSG—ICR-CTSU Partnership) [Cancer Research UK grant numbers CRUKE/03/022, CRUKE/03/023, A15955; National Institute for Health Research Royal Marsden/Institute of Cancer Research Biomedical Research Centre [no grant number]; and National Institute for Health Research/Cambridge Biomedical Research Centre [no grant number]

**Alliance for Clinical Trials in Oncology** [US NIH grant number CA180821];

**SWOG** [US NIH grant number CA32102];

**ECOG-ACRIN Cancer Research Group** [US NIH grant numbers CA21115, CA16116];

**NRG Oncology** [US NIH grant numbers U10CA180868, U10CA180822, UG1CA189867];

**Canadian Cancer Trials Group** [US NIH grant number CA077202; and Canadian Cancer Society Research Institute grant numbers 015469, 021039].

### **III. Supplemental Methods, Figures and Tables**

#### **III. A. Methods**

##### Patients

Eligibility in each trial required documented premenopausal status, defined by regular menses without exogenous hormones during the prior six months and/or estradiol level in the premenopausal range; patients who had completed chemotherapy prior to entry into SOFT were required to have a premenopausal estradiol level. Inclusion criteria were histologically-proven operable breast cancer confined to the breast and ipsilateral axilla, with the exception of internal-mammary-node involvement detected by means of sentinel-node biopsy, and tumor that expressed estrogen or progesterone receptors in at least 10% of cells, as assessed with the use of immunohistochemical testing. Patients with synchronous bilateral hormone-receptor-positive breast cancer were eligible. Patients had undergone either a total mastectomy with subsequent optional radiotherapy or breast-conserving surgery with subsequent radiotherapy. Either axillary dissection or a negative sentinel-node biopsy was required. Macrometastasis in a sentinel node required axillary dissection or irradiation. All the patients in TEXT and the patients in SOFT who did not receive chemotherapy underwent randomization within 12 weeks after definitive surgery; patients in SOFT who received neoadjuvant or adjuvant chemotherapy underwent randomization within 8 months after completing chemotherapy, once premenopausal level of estradiol was confirmed. Consistent with this design, patients in SOFT, but not in TEXT, were allowed to receive adjuvant oral endocrine therapy before randomization.

##### Study Design

TEXT was designed to evaluate 5 years of therapy consisting of exemestane plus the gonadotropin-releasing-hormone (GnRH) agonist triptorelin versus tamoxifen plus triptorelin in women who received ovarian-suppression therapy from the start of adjuvant therapy. Eligible women were randomly assigned in a 1:1 ratio to receive oral exemestane (Aromasin, Pfizer), at a dose of 25 mg daily, plus triptorelin (Decapeptyl Depot [triptorelin acetate], Ipsen; or Trelstar Depot [triptorelin pamoate], Debio), at a dose of 3.75 mg administered by means of intramuscular injection every 28 days, or oral tamoxifen at a dose of 20 mg daily plus triptorelin. Bilateral oophorectomy or ovarian irradiation was allowed after at least 6 months of triptorelin. Chemotherapy was optional in TEXT, and if administered, was started concomitantly with triptorelin; oral endocrine therapy was started after the completion of chemotherapy. If chemotherapy was not administered, oral endocrine therapy was started 6 to 8 weeks after the initiation of triptorelin, to allow for a decline in ovarian estrogen production. Randomization was

stratified according to the intended use of adjuvant chemotherapy (yes vs. no) and lymph-node status (negative vs. positive).

SOFT was designed to evaluate 5 years of treatment with tamoxifen versus tamoxifen plus ovarian suppression versus exemestane plus ovarian suppression in women who remained premenopausal after completion of neoadjuvant or adjuvant chemotherapy or in women for whom adjuvant tamoxifen alone (without neoadjuvant or adjuvant chemotherapy) was considered suitable treatment. Eligible women in SOFT were randomly assigned in a 1:1:1 ratio to receive oral tamoxifen at a dose of 20 mg daily, tamoxifen plus ovarian suppression, or oral exemestane at a dose of 25 mg daily plus ovarian suppression. Ovarian suppression was achieved by choice of triptorelin (Decapeptyl Depot [triptorelin acetate], Ipsen; or Trelstar Depot [triptorelin pamoate], Debio) at a dose of 3.75 mg administered by means of intramuscular injection every 28 days, bilateral oophorectomy, or bilateral ovarian irradiation. Patients receiving triptorelin could subsequently opt to undergo oophorectomy or irradiation. Randomization was stratified according to prior use of (neo)adjuvant chemotherapy (yes vs. no), lymph-node status (negative vs. positive), and intended initial method of ovarian suppression, if the woman was assigned to a group that included ovarian-suppression therapy.

In each trial, randomization to open-label treatment was performed by means of the IBCSG internet-based system, with the use of permuted blocks.

In both TEXT and SOFT, protocol-assigned endocrine therapy continued for 5 years from the date of randomization, and the protocols did not address the issue of extended adjuvant endocrine therapy beyond 5 years, except the requirement to record any therapy.

Bisphosphonates were not permitted unless indicated for reduced bone density (T-score, -1.5 or lower) or required for participation in a randomized trial of adjuvant bisphosphonate therapy. Adjuvant trastuzumab was allowed, and was not considered as chemotherapy when considering the timing of enrollment relative to chemotherapy completion in SOFT.

Patients were assessed with physical examination, menstrual and medication documentation every three months for the first year, then every six months until year 6 and annually thereafter. Annual mammography and bone densitometry were recommended. Blood tests and additional imaging were performed if medically indicated or according to local practice. All patients were followed according to protocol regardless of the treatment actually taken, unless a patient



explicitly withdrew consent to further trial participation or was lost to follow-up; some of these patients consented to continued submission of survival status from medical records or such updates were obtainable from tumor and vital registries and could be submitted according to the protocol follow-up schedule. We systematically queried for 22 targeted adverse events and collected other grade 3 or higher adverse events using the Common Terminology Criteria for Adverse Events (CTCAE) v3.0, starting at randomization until 12 months after the last dose of any protocol-assigned therapy.

#### Study Oversight

TEXT (IBCSG 25-02/BIG 3-02; NCT00066703) and SOFT (IBCSG 24-02/BIG 2-02; NCT00066690) were coordinated by the IBCSG, which was responsible for the study design, randomization, collection and management of data, medical review, data analysis, and reporting. The trial was conducted in accordance with the provisions of the Declaration of Helsinki. The IBCSG ethics committee and ethics committees at each center approved the study protocol and all patients provided written informed consent. The IBCSG data and safety monitoring committee reviewed safety data semi-annually.

Pfizer and Ipsen, the respective manufacturers of exemestane and triptorelin, donated the study drugs; neither manufacturer imposed restrictions with respect to the trial data. The manuscript was written solely by the authors, who vouch for the data and analyses reported and fidelity of the study to the protocol. The steering committee (which included employees of Pfizer and Ipsen) reviewed the manuscript and were responsible for the decision to submit it for publication.

#### Statistical Design

The original statistical designs and sample-size assumptions and the amended plans have been described previously. The steering committee proposed, and the data and safety monitoring committee endorsed, the amended analysis plans without knowledge of the data according to treatment assignment. No interim analyses were performed.

The original statistical analysis plans for SOFT and TEXT were to compare disease-free survival between treatment groups within each trial separately, with a planned secondary combined analysis of exemestane plus ovarian suppression versus tamoxifen plus ovarian suppression. Protocol amendments to the analysis plans were adopted in 2011, designating the test of superiority of tamoxifen plus ovarian suppression over tamoxifen alone as the primary analysis

for SOFT, and the comparison of exemestane plus ovarian suppression with tamoxifen alone became a secondary objective. The amendments designated the combined analysis of data from TEXT and SOFT as the primary analysis of exemestane plus ovarian suppression versus tamoxifen plus ovarian suppression.

At the time of amendment, we calculated that with an estimated 186 events of disease recurrence, second invasive cancer, or death in the tamoxifen plus ovarian suppression and tamoxifen alone groups of SOFT after a median follow-up of 5 years, the study would have at least 80%, 69%, and 52% power to detect reductions in risk of 33.5%, 30%, and 25%, respectively, with tamoxifen plus ovarian suppression versus tamoxifen alone, at a two-sided alpha level of 0.05. For the combined analysis of TEXT and SOFT, we calculated that with an estimated 436 events of disease recurrence, second invasive cancer, or death, the study would have at least 84% power to detect a hazard ratio of 0.75 with exemestane plus ovarian suppression versus tamoxifen plus ovarian suppression in the primary combined analysis, at a two-sided alpha level of 0.05.

#### Statistical Analysis

The visit cut-off date was December 31, 2016, and the database-lock date for analysis was May 4, 2017.

The primary endpoint, disease-free survival, was defined as the time from randomization to the first appearance of one of the following: invasive recurrence of breast cancer (local, regional or distant), invasive contralateral breast cancer, second (non-breast) invasive cancer, or death without recurrence or second cancer. Censoring of time-to-event endpoints was at the date of last follow-up visit (or date last known alive for overall survival), including for those 378 patients in SOFT (577 patients in the combined analysis of SOFT and TEXT) who during follow-up either withdrew consent or were lost to follow-up (see **Figs. S1, S5**). There were no sensitivity analyses performed with regard to withdrawal of consent/loss to follow-up. P-values and widths of CIs were not adjusted for multiplicity of tests.

Secondary analyses were conducted in the population of patients with HER2-negative disease, on the basis of the clinical relevance of the subgroup as well as the presence of heterogeneity of the treatment effect between HER2-negative and HER2-positive subgroups. These analyses report estimates and CIs only; CI widths were not adjusted for multiplicity and inference about treatment comparisons or heterogeneity of the treatment effect within the HER2-negative population should be viewed as preliminary.

### III. B. Efficacy of Ovarian Suppression in SOFT Figures and Tables

#### Figure S1. SOFT Randomization, Treatment, and Follow-up.

CONSORT flow diagram showing the intention-to-treat population of 3047 patients for the two pairwise comparisons of tamoxifen plus ovarian suppression with tamoxifen alone (SOFT primary analysis comparison; N=2033) and exemestane plus ovarian suppression with tamoxifen alone. During follow-up, 378 of 3047 patients either withdrew consent or were lost to follow-up and were censored at date of last follow-up visit (median time to withdrawal or lost was 3.0 years [interquartile range, 1.1-5.1 years]); for 132 of 378 patients, the patient consented to continued submission of disease-recurrence and survival status from medical records or such updates are obtainable from tumor and vital registries according to protocol follow-up schedule and overall survival is censored at date last known alive (median follow-up 7.4 years [interquartile range, 5.9-9.6 years]). Abbreviations: ITT denotes intention-to-treat, OS ovarian suppression, SOFT Suppression of Ovarian Function Trial.

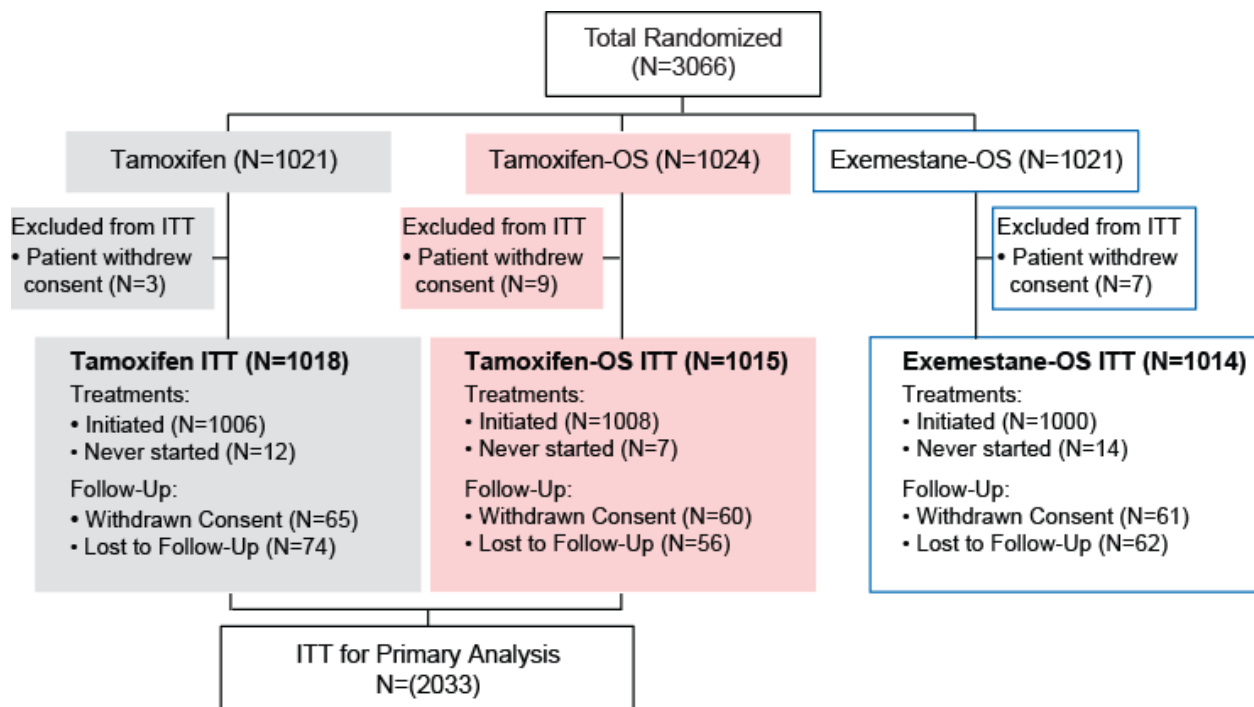

**Figure S2A. Results of Cox Proportional-hazards Models for the Disease-free Survival (DFS) Treatment Comparison of Tamoxifen plus Ovarian Suppression vs. Tamoxifen Alone in the SOFT Primary Analysis, among All Patients and According to Subgroups.**

Median follow-up in SOFT was 8 years. The solid vertical line is placed at 0.76, the hazard-ratio estimate for all patients. The x-axis is scaled according to the natural logarithm of the hazard ratio. The size of the square is inversely proportional to the standard error of the hazard ratio.

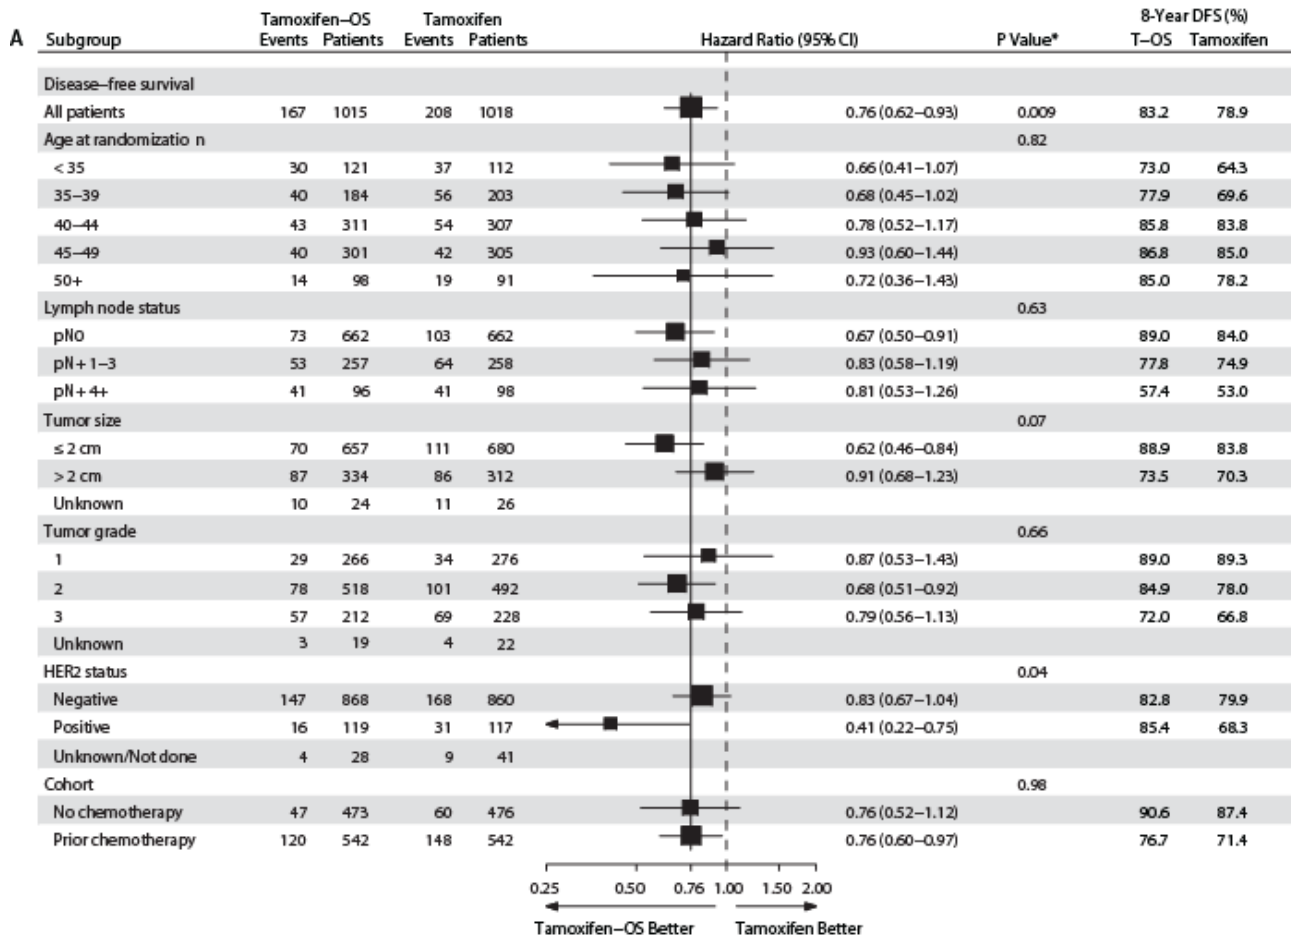

\*P-Value for “All patients” is the stratified log-rank test; for other variables, P-Value is test of heterogeneity of the treatment effect across subgroups, using test of treatment-by-variable interaction from stratified Cox model, with “Unknown” or “Unknown/Not done” group omitted from the test.

Abbreviations: CI denotes confidence interval, T tamoxifen, OS ovarian suppression.

**Figure S2B. Results of Cox Proportional-hazards Models for the Disease-free Survival (DFS) Treatment Comparison of Exemestane Plus Ovarian Suppression vs. Tamoxifen Alone in SOFT, among All Patients and According to Subgroups.**

Median follow-up in SOFT was 8 years. The solid vertical line is placed at 0.65, the hazard-ratio estimate for all patients. The x-axis is scaled according to the natural logarithm of the hazard ratio. The size of the square is inversely proportional to the standard error of the hazard ratio.

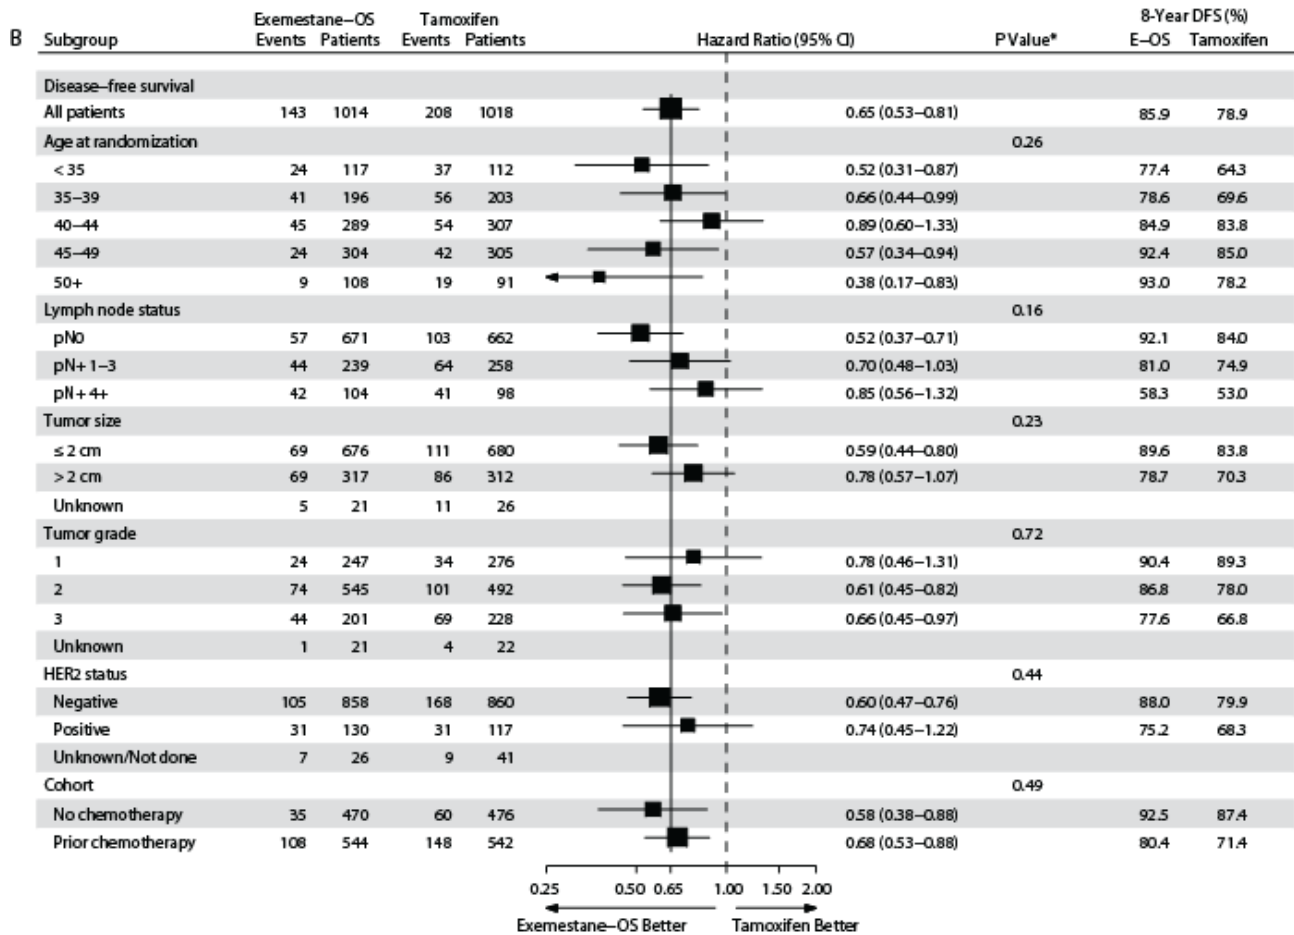

\*P-Values are for test of heterogeneity of the treatment effect across subgroups, using test of treatment-by-variable interaction from stratified Cox model, with “Unknown” or “Unknown/Not done” group omitted from the test.

Abbreviations: CI denotes confidence interval, E exemestane, OS ovarian suppression.

**Figure S3A. Kaplan-Meier Estimates of Freedom from Breast Cancer after a Median Follow-up of 8 Years in the SOFT Population.**

The estimates for the primary analysis population and the exemestane-ovarian suppression group of SOFT are summarized for all patients (Panel A) and according to chemotherapy cohort (Panels B and C). The 8-year values are based on Kaplan-Meier estimates of the time to an event. The hazard ratios are for recurrence. OS denotes ovarian suppression, T tamoxifen, E exemestane, HR hazard ratio, CI confidence interval.

**Figure S3B. Kaplan-Meier Estimates of Freedom from Recurrence of Breast Cancer at a Distant Site and Overall Survival after a Median Follow-up of 8 Years in the SOFT Population.**

The estimates for the primary analysis population and the exemestane-ovarian suppression group of SOFT are summarized for all patients (Panels A and B) and according to chemotherapy cohort (Panels C through F). The 8-year values are based on Kaplan-Meier estimates of the time to an event. The hazard ratios in Panels A,C,E are for recurrence of breast cancer at a distant site; the hazard ratios in Panel B,D,F are for death. OS denotes ovarian suppression, T tamoxifen, E exemestane, HR hazard ratio, CI confidence interval.

Figure S3A

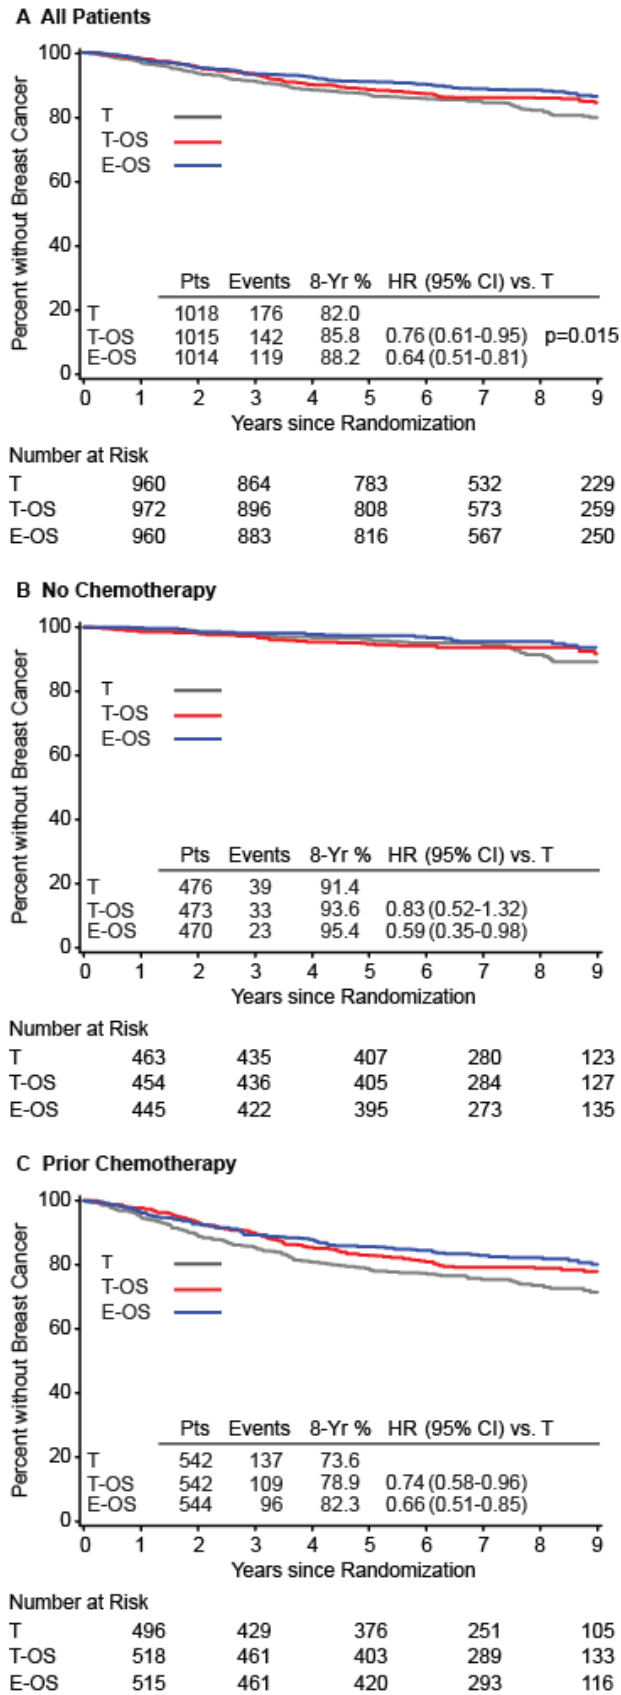

Figure S3B

**A Freedom from Distant Recurrence**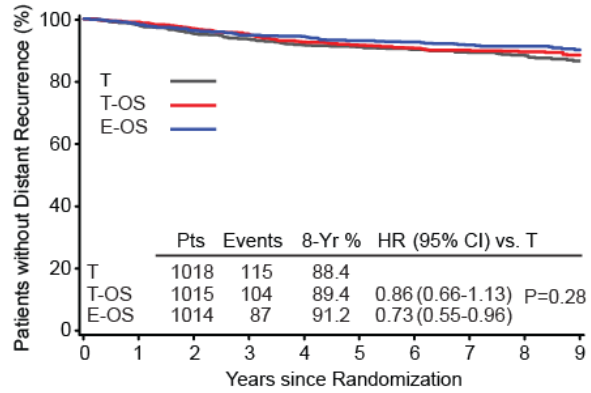

| Number at Risk |     |     |     |     |     |
|----------------|-----|-----|-----|-----|-----|
| T              | 970 | 884 | 818 | 561 | 251 |
| T-OS           | 979 | 910 | 835 | 591 | 269 |
| E-OS           | 964 | 896 | 833 | 586 | 260 |

**B Overall Survival**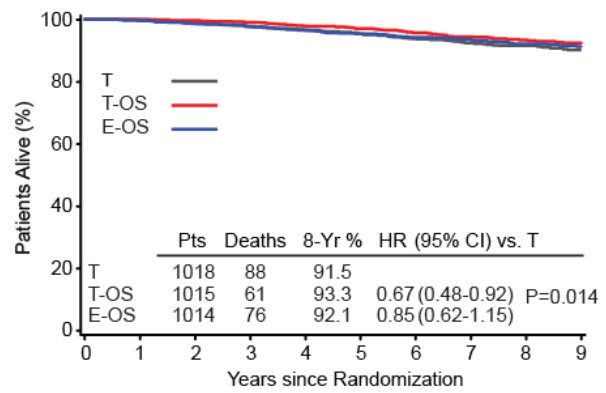

| Number at Risk |      |     |     |     |     |
|----------------|------|-----|-----|-----|-----|
| T              | 1007 | 952 | 896 | 612 | 280 |
| T-OS           | 999  | 971 | 911 | 644 | 292 |
| E-OS           | 990  | 951 | 888 | 629 | 283 |

**C No Chemotherapy, Freedom from Distant Recurrence**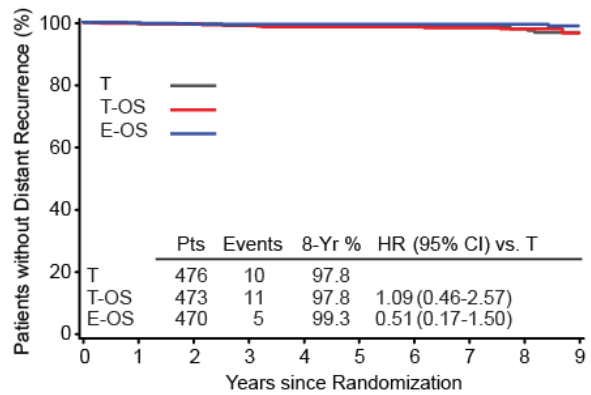

| Number at Risk |     |     |     |     |     |
|----------------|-----|-----|-----|-----|-----|
| T              | 466 | 441 | 418 | 291 | 135 |
| T-OS           | 458 | 443 | 421 | 295 | 134 |
| E-OS           | 445 | 427 | 404 | 283 | 139 |

**D No Chemotherapy, Overall Survival**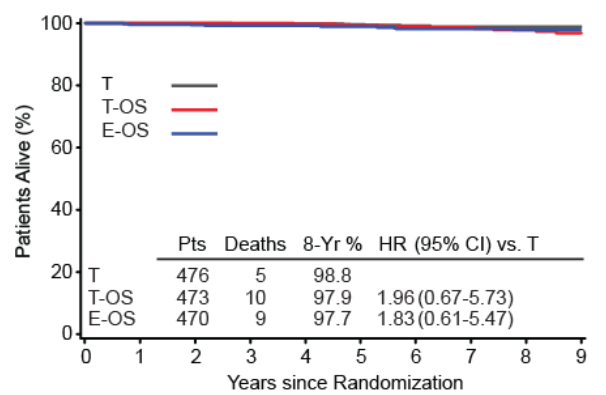

| Number at Risk |     |     |     |     |     |
|----------------|-----|-----|-----|-----|-----|
| T              | 473 | 455 | 435 | 301 | 140 |
| T-OS           | 467 | 458 | 435 | 309 | 141 |
| E-OS           | 455 | 445 | 423 | 297 | 147 |

**E Prior Chemotherapy, Freedom from Distant Recurrence**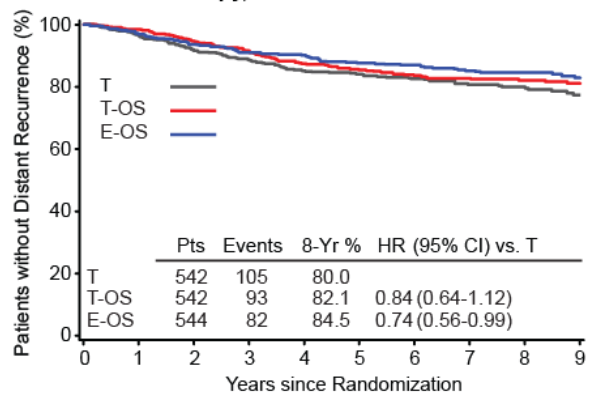

| Number at Risk |     |     |     |     |     |
|----------------|-----|-----|-----|-----|-----|
| T              | 504 | 443 | 400 | 269 | 115 |
| T-OS           | 521 | 467 | 414 | 296 | 136 |
| E-OS           | 519 | 469 | 428 | 302 | 122 |

**F Prior Chemotherapy, Overall Survival**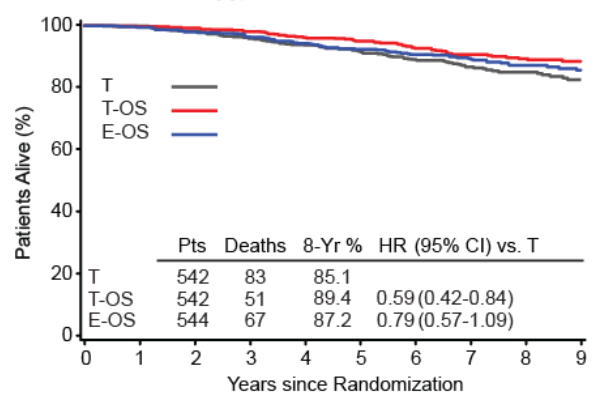

| Number at Risk |     |     |     |     |     |
|----------------|-----|-----|-----|-----|-----|
| T              | 534 | 497 | 461 | 310 | 139 |
| T-OS           | 532 | 513 | 477 | 335 | 153 |
| E-OS           | 535 | 506 | 465 | 331 | 137 |



**Figure S4. Kaplan-Meier Estimates of Freedom from Recurrence of Breast Cancer and Freedom from the Recurrence of Breast Cancer at a Distant Site, among Women Younger than 35 Years of Age at Randomization in the SOFT Population.**

Panel A shows Kaplan-Meier estimates of freedom from recurrence of breast cancer, and Panel B shows freedom from recurrence of breast cancer at a distant site. The 8-year values are based on Kaplan-Meier estimates of the time to an event. The median follow-up in SOFT was 8 years. OS denotes ovarian suppression, T tamoxifen, E exemestane.

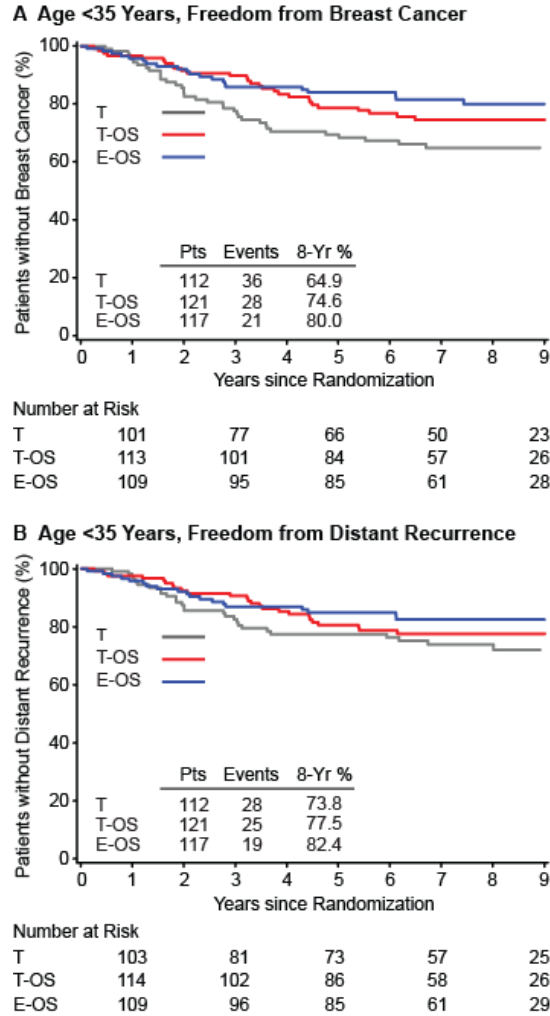

**Table S1.** Kaplan-Meier estimates of 8-year end point rates with 95% confidence intervals, according to treatment assignment in SOFT, overall and by HER2 status and chemotherapy stratum. Bold values are those reported in the manuscript text.

|                  |                  |                      | Tamoxifen      |             |               |              |              | Tamoxifen-OS |             |               |              |              | Exemestane-OS |             |               |              |              |             |
|------------------|------------------|----------------------|----------------|-------------|---------------|--------------|--------------|--------------|-------------|---------------|--------------|--------------|---------------|-------------|---------------|--------------|--------------|-------------|
|                  |                  |                      | N Pts          | N Events    | 8-yr Rate (%) | 95% Lower CI | 95% Upper CI | N Pts        | N Events    | 8-yr Rate (%) | 95% Lower CI | 95% Upper CI | N Pts         | N Events    | 8-yr Rate (%) | 95% Lower CI | 95% Upper CI |             |
|                  | <b>HER2</b>      | <b>Chemo stratum</b> |                |             |               |              |              |              |             |               |              |              |               |             |               |              |              |             |
| <b>DFS</b>       | <b>Overall</b>   | <b>Overall</b>       | <b>1018</b>    | <b>208</b>  | <b>78.9</b>   | <b>75.9</b>  | <b>81.6</b>  | <b>1015</b>  | <b>167</b>  | <b>83.2</b>   | <b>80.5</b>  | <b>85.4</b>  | <b>1014</b>   | <b>143</b>  | <b>85.9</b>   | <b>83.4</b>  | <b>88.1</b>  |             |
|                  |                  | No Chemo             | 476            | 60          | 87.4          | 83.4         | 90.4         | 473          | 47          | 90.6          | 87.3         | 93.0         | 470           | 35          | 92.5          | 89.3         | 94.8         |             |
|                  |                  | Prior Chemo          | <b>542</b>     | <b>148</b>  | <b>71.4</b>   | <b>67.0</b>  | <b>75.4</b>  | <b>542</b>   | <b>120</b>  | <b>76.7</b>   | <b>72.7</b>  | <b>80.2</b>  | <b>544</b>    | <b>108</b>  | <b>80.4</b>   | <b>76.6</b>  | <b>83.7</b>  |             |
|                  | Negative         | Overall              | 860            | 168         | 79.9          | 76.7         | 82.7         | 868          | 147         | 82.8          | 80.0         | 85.3         | 858           | 105         | 88.0          | 85.5         | 90.2         |             |
|                  |                  | No Chemo             | 437            | 55          | 87.7          | 83.5         | 90.8         | 445          | 42          | 91.3          | 88.1         | 93.7         | 447           | 33          | 92.7          | 89.5         | 95.0         |             |
|                  |                  | Prior Chemo          | <b>423</b>     | <b>113</b>  | <b>71.9</b>   | <b>66.8</b>  | <b>76.3</b>  | <b>423</b>   | <b>105</b>  | <b>73.9</b>   | <b>69.1</b>  | <b>78.0</b>  | <b>411</b>    | <b>72</b>   | <b>83.1</b>   | <b>78.8</b>  | <b>86.5</b>  |             |
|                  | Positive         | Overall              | 117            | 31          | 68.3          | 57.5         | 76.9         | 119          | 16          | 85.4          | 77.3         | 90.8         | 130           | 31          | 75.2          | 66.4         | 82.0         |             |
|                  |                  | No Chemo             | 23             | 3           | -             | -            | -            | 17           | 3           | -             | -            | -            | 13            | 0           | -             | -            | -            |             |
|                  |                  | Prior Chemo          | 94             | 28          | -             | -            | -            | 102          | 13          | -             | -            | -            | 117           | 31          | -             | -            | -            |             |
|                  | Unknown/Not done | Overall              | 41             | 9           | -             | -            | -            | 28           | 4           | -             | -            | -            | 26            | 7           | -             | -            | -            |             |
|                  |                  | No Chemo             | 16             | 2           | -             | -            | -            | 11           | 2           | -             | -            | -            | 10            | 2           | -             | -            | -            |             |
|                  |                  | Prior Chemo          | 25             | 7           | -             | -            | -            | 17           | 2           | -             | -            | -            | 16            | 5           | -             | -            | -            |             |
|                  | <b>BCFI</b>      | <b>Overall</b>       | <b>Overall</b> | 1018        | 176           | 82.0         | 79.2         | 84.5         | 1015        | 142           | 85.8         | 83.3         | 87.9          | 1014        | 119           | 88.2         | 85.9         | 90.2        |
|                  |                  |                      | No Chemo       | <b>476</b>  | <b>39</b>     | <b>91.4</b>  | <b>87.8</b>  | <b>94.0</b>  | <b>473</b>  | <b>33</b>     | <b>93.6</b>  | <b>90.9</b>  | <b>95.6</b>   | <b>470</b>  | <b>23</b>     | <b>95.4</b>  | <b>92.8</b>  | <b>97.1</b> |
|                  |                  |                      | Prior Chemo    | 542         | 137           | 73.6         | 69.3         | 77.4         | 542         | 109           | 78.9         | 75.0         | 82.3          | 544         | 96            | 82.3         | 78.6         | 85.4        |
| Negative         |                  | Overall              | 860            | 138         | 83.4          | 80.4         | 86.0         | 868          | 126         | 85.3          | 82.7         | 87.6         | 858           | 85          | 90.3          | 87.9         | 92.2         |             |
|                  |                  | No Chemo             | 437            | 35          | 91.8          | 88.0         | 94.4         | 445          | 30          | 93.9          | 91.1         | 95.9         | 447           | 22          | 95.5          | 92.8         | 97.2         |             |
|                  |                  | Prior Chemo          | 423            | 103         | 74.7          | 69.8         | 78.9         | 423          | 96          | 76.3          | 71.7         | 80.3         | 411           | 63          | 84.8          | 80.6         | 88.1         |             |
| Positive         |                  | Overall              | 117            | 31          | 68.3          | 57.5         | 76.9         | 119          | 13          | 88.1          | 80.4         | 93.0         | 130           | 28          | 77.5          | 68.8         | 84.0         |             |
|                  |                  | No Chemo             | 23             | 3           | -             | -            | -            | 17           | 2           | -             | -            | -            | 13            | 0           | -             | -            | -            |             |
|                  |                  | Prior Chemo          | 94             | 28          | -             | -            | -            | 102          | 11          | -             | -            | -            | 117           | 28          | -             | -            | -            |             |
| Unknown/Not done |                  | Overall              | 41             | 7           | -             | -            | -            | 28           | 3           | -             | -            | -            | 26            | 6           | -             | -            | -            |             |
|                  |                  | No Chemo             | 16             | 1           | -             | -            | -            | 11           | 1           | -             | -            | -            | 10            | 1           | -             | -            | -            |             |
|                  |                  | Prior Chemo          | 25             | 6           | -             | -            | -            | 17           | 2           | -             | -            | -            | 16            | 5           | -             | -            | -            |             |
| <b>DRFI</b>      |                  | <b>Overall</b>       | <b>Overall</b> | <b>1018</b> | <b>115</b>    | <b>88.4</b>  | <b>86.0</b>  | <b>90.3</b>  | <b>1015</b> | <b>104</b>    | <b>89.4</b>  | <b>87.2</b>  | <b>91.2</b>   | <b>1014</b> | <b>87</b>     | <b>91.2</b>  | <b>89.2</b>  | <b>92.9</b> |
|                  |                  |                      | No Chemo       | 476         | 10            | 97.8         | 95.6         | 99.0         | 473         | 11            | 97.8         | 95.7         | 98.9          | 470         | 5             | 99.3         | 97.9         | 99.8        |
|                  |                  |                      | Prior Chemo    | <b>542</b>  | <b>105</b>    | <b>80.0</b>  | <b>76.0</b>  | <b>83.3</b>  | <b>542</b>  | <b>93</b>     | <b>82.1</b>  | <b>78.3</b>  | <b>85.2</b>   | <b>544</b>  | <b>82</b>     | <b>84.5</b>  | <b>81.0</b>  | <b>87.5</b> |
|                  | Negative         | Overall              | 860            | 89          | 89.6          | 87.1         | 91.6         | 868          | 91          | 89.3          | 86.9         | 91.3         | 858           | 58          | 93.2          | 91.2         | 94.8         |             |
|                  |                  | No Chemo             | 437            | 9           | 97.9          | 95.5         | 99.0         | 445          | 9           | 98.3          | 96.4         | 99.2         | 447           | 5           | 99.3          | 97.8         | 99.8         |             |
|                  |                  | Prior Chemo          | <b>423</b>     | <b>80</b>   | <b>80.8</b>   | <b>76.4</b>  | <b>84.5</b>  | <b>423</b>   | <b>82</b>   | <b>79.8</b>   | <b>75.3</b>  | <b>83.5</b>  | <b>411</b>    | <b>53</b>   | <b>86.8</b>   | <b>82.8</b>  | <b>89.9</b>  |             |
|                  | Positive         | Overall              | 117            | 22          | 78.6          | 69.2         | 85.4         | 119          | 11          | 89.6          | 81.9         | 94.2         | 130           | 25          | 79.9          | 71.4         | 86.1         |             |
|                  |                  | No Chemo             | 23             | 1           | -             | -            | -            | 17           | 2           | -             | -            | -            | 13            | 0           | -             | -            | -            |             |
|                  |                  | Prior Chemo          | 94             | 21          | -             | -            | -            | 102          | 9           | -             | -            | -            | 117           | 25          | -             | -            | -            |             |
|                  | Unknown/Not done | Overall              | 41             | 4           | -             | -            | -            | 28           | 2           | -             | -            | -            | 26            | 4           | -             | -            | -            |             |
|                  |                  | No Chemo             | 16             | 0           | -             | -            | -            | 11           | 0           | -             | -            | -            | 10            | 0           | -             | -            | -            |             |
|                  |                  | Prior Chemo          | 25             | 4           | -             | -            | -            | 17           | 2           | -             | -            | -            | 16            | 4           | -             | -            | -            |             |
|                  | <b>OS</b>        | <b>Overall</b>       | <b>Overall</b> | <b>1018</b> | <b>88</b>     | <b>91.5</b>  | <b>89.4</b>  | <b>93.2</b>  | <b>1015</b> | <b>61</b>     | <b>93.3</b>  | <b>91.4</b>  | <b>94.8</b>   | <b>1014</b> | <b>76</b>     | <b>92.1</b>  | <b>90.0</b>  | <b>93.7</b> |
|                  |                  |                      | No Chemo       | 476         | 5             | 98.8         | 97.1         | 99.5         | 473         | 10            | 97.9         | 95.7         | 98.9          | 470         | 9             | 97.7         | 95.6         | 98.8        |
|                  |                  |                      | Prior Chemo    | <b>542</b>  | <b>83</b>     | <b>85.1</b>  | <b>81.5</b>  | <b>88.1</b>  | <b>542</b>  | <b>51</b>     | <b>89.4</b>  | <b>86.1</b>  | <b>91.9</b>   | <b>544</b>  | <b>67</b>     | <b>87.2</b>  | <b>83.8</b>  | <b>90.0</b> |
| Negative         |                  | Overall              | 860            | 68          | 92.2          | 89.9         | 93.9         | 868          | 53          | 93.4          | 91.3         | 95.0         | 858           | 53          | 93.4          | 91.3         | 95.0         |             |
|                  |                  | No Chemo             | 437            | 4           | 99.0          | 97.4         | 99.6         | 445          | 7           | 98.7          | 97.0         | 99.5         | 447           | 9           | 97.7          | 95.5         | 98.8         |             |
|                  |                  | Prior Chemo          | <b>423</b>     | <b>64</b>   | <b>85.2</b>   | <b>81.0</b>  | <b>88.5</b>  | <b>423</b>   | <b>46</b>   | <b>87.7</b>   | <b>83.7</b>  | <b>90.8</b>  | <b>411</b>    | <b>44</b>   | <b>88.7</b>   | <b>84.8</b>  | <b>91.7</b>  |             |
| Positive         |                  | Overall              | 117            | 16          | 86.0          | 77.4         | 91.5         | 119          | 5           | 95.1          | 88.5         | 97.9         | 130           | 19          | 85.9          | 77.7         | 91.2         |             |

## Francis, Pagani et al., Supplementary Material

|                     |             | Tamoxifen |             |                     |                    |                    | Tamoxifen-OS |             |                     |                    |                    | Exemestane-OS |             |                     |                    |                    |
|---------------------|-------------|-----------|-------------|---------------------|--------------------|--------------------|--------------|-------------|---------------------|--------------------|--------------------|---------------|-------------|---------------------|--------------------|--------------------|
|                     |             | N<br>Pts  | N<br>Events | 8-yr<br>Rate<br>(%) | 95%<br>Lower<br>CI | 95%<br>Upper<br>CI | N<br>Pts     | N<br>Events | 8-yr<br>Rate<br>(%) | 95%<br>Lower<br>CI | 95%<br>Upper<br>CI | N<br>Pts      | N<br>Events | 8-yr<br>Rate<br>(%) | 95%<br>Lower<br>CI | 95%<br>Upper<br>CI |
| Unknown/Not<br>done | No Chemo    | 23        | 0           | -                   | -                  | -                  | 17           | 1           | -                   | -                  | -                  | 13            | 0           | -                   | -                  | -                  |
|                     | Prior Chemo | 94        | 16          | -                   | -                  | -                  | 102          | 4           | -                   | -                  | -                  | 117           | 19          | -                   | -                  | -                  |
|                     | Overall     | 41        | 4           | -                   | -                  | -                  | 28           | 3           | -                   | -                  | -                  | 26            | 4           | -                   | -                  | -                  |
|                     | No Chemo    | 16        | 1           | -                   | -                  | -                  | 11           | 2           | -                   | -                  | -                  | 10            | 0           | -                   | -                  | -                  |
|                     | Prior Chemo | 25        | 3           | -                   | -                  | -                  | 17           | 1           | -                   | -                  | -                  | 16            | 4           | -                   | -                  | -                  |

**Table S2.** Sites of first disease-free survival (DFS) event after a median follow-up in SOFT of 8 years, overall and according to chemotherapy cohort and treatment assignment. (A) denominator is all patients; (B) denominator is patients who had a DFS event. (C) Deaths without preceding cancer event.

| A                                    | Chemotherapy Cohort |       |             |       | Treatment Assignment |       |              |       |               |       | Overall |       |
|--------------------------------------|---------------------|-------|-------------|-------|----------------------|-------|--------------|-------|---------------|-------|---------|-------|
|                                      | No Chemo            |       | Prior Chemo |       | Tamoxifen            |       | Tamoxifen-OS |       | Exemestane-OS |       |         |       |
|                                      | N                   | %     | N           | %     | N                    | %     | N            | %     | N             | %     | N       | %     |
| <i>No. of patients</i>               | 1419                | 100.0 | 1628        | 100.0 | 1018                 | 100.0 | 1015         | 100.0 | 1014          | 100.0 | 3047    | 100.0 |
| <b>DFS event</b>                     |                     |       |             |       |                      |       |              |       |               |       |         |       |
| No                                   | 1277                | 90.0  | 1252        | 76.9  | 810                  | 79.6  | 848          | 83.5  | 871           | 85.9  | 2529    | 83.0  |
| Yes                                  | 142                 | 10.0  | 376         | 23.1  | 208                  | 20.4  | 167          | 16.5  | 143           | 14.1  | 518     | 17.0  |
| <b>Site of first DFS event</b>       |                     |       |             |       |                      |       |              |       |               |       |         |       |
| No failure                           | 1277                | 90.0  | 1252        | 76.9  | 810                  | 79.6  | 848          | 83.5  | 871           | 85.9  | 2529    | 83.0  |
| Local                                | 23                  | 1.6   | 41          | 2.5   | 29                   | 2.8   | 17           | 1.7   | 18            | 1.8   | 64      | 2.1   |
| Contralateral breast ± above         | 33                  | 2.3   | 18          | 1.1   | 25                   | 2.5   | 14           | 1.4   | 12            | 1.2   | 51      | 1.7   |
| Regional ± above                     | 14                  | 1.0   | 27          | 1.7   | 19                   | 1.9   | 15           | 1.5   | 7             | 0.7   | 41      | 1.3   |
| Soft tissue/ distant LN ± above      | 1                   | 0.1   | 5           | 0.3   | 3                    | 0.3   | 2            | 0.2   | 1             | 0.1   | 6       | 0.2   |
| Bone ± above                         | 11                  | 0.8   | 113         | 6.9   | 40                   | 3.9   | 40           | 3.9   | 44            | 4.3   | 124     | 4.1   |
| Viscera ± above                      | 13                  | 0.9   | 136         | 8.4   | 59                   | 5.8   | 54           | 5.3   | 36            | 3.6   | 149     | 4.9   |
| Second (non-breast) malignancy       | 40                  | 2.8   | 30          | 1.8   | 25                   | 2.5   | 24           | 2.4   | 21            | 2.1   | 70      | 2.3   |
| Death without preceding cancer event | 6                   | 0.4   | 3           | 0.2   | 6                    | 0.6   | 1            | 0.1   | 2             | 0.2   | 9       | 0.3   |
| Death, recurrence suspected          | 1                   | 0.1   | 2           | 0.1   | 1                    | 0.1   | -            | -     | 2             | 0.2   | 3       | 0.1   |
| Death, no recurrence information     | -                   | -     | 1           | 0.1   | 1                    | 0.1   | -            | -     | -             | -     | 1       | 0.0   |

| B                                        | Chemotherapy Cohort |       |             |       | Treatment Assignment |       |              |       |               |       | Overall |       |
|------------------------------------------|---------------------|-------|-------------|-------|----------------------|-------|--------------|-------|---------------|-------|---------|-------|
|                                          | No Chemo            |       | Prior Chemo |       | Tamoxifen            |       | Tamoxifen-OS |       | Exemestane-OS |       |         |       |
|                                          | N                   | %     | N           | %     | N                    | %     | N            | %     | N             | %     | N       | %     |
| <i>No. of patients having DFS events</i> | 142                 | 100.0 | 376         | 100.0 | 208                  | 100.0 | 167          | 100.0 | 143           | 100.0 | 518     | 100.0 |
| <b>Site of first DFS event</b>           |                     |       |             |       |                      |       |              |       |               |       |         |       |
| Local                                    | 23                  | 16.2  | 41          | 10.9  | 29                   | 13.9  | 17           | 10.2  | 18            | 12.6  | 64      | 12.4  |
| Contralateral breast ± above             | 33                  | 23.2  | 18          | 4.8   | 25                   | 12.0  | 14           | 8.4   | 12            | 8.4   | 51      | 9.8   |
| Regional ± above                         | 14                  | 9.9   | 27          | 7.2   | 19                   | 9.1   | 15           | 9.0   | 7             | 4.9   | 41      | 7.9   |
| Soft tissue/ distant LN ± above          | 1                   | 0.7   | 5           | 1.3   | 3                    | 1.4   | 2            | 1.2   | 1             | 0.7   | 6       | 1.2   |
| Bone ± above                             | 11                  | 7.7   | 113         | 30.1  | 40                   | 19.2  | 40           | 24.0  | 44            | 30.8  | 124     | 23.9  |
| Viscera ± above                          | 13                  | 9.2   | 136         | 36.2  | 59                   | 28.4  | 54           | 32.3  | 36            | 25.2  | 149     | 28.8  |
| Second (non-breast) malignancy           | 40                  | 28.2  | 30          | 8.0   | 25                   | 12.0  | 24           | 14.4  | 21            | 14.7  | 70      | 13.5  |
| Death without preceding cancer event     | 6                   | 4.2   | 3           | 0.8   | 6                    | 2.9   | 1            | 0.6   | 2             | 1.4   | 9       | 1.7   |
| Death, recurrence suspected              | 1                   | 0.7   | 2           | 0.5   | 1                    | 0.5   | -            | -     | 2             | 1.4   | 3       | 0.6   |
| Death, no recurrence information         | -                   | -     | 1           | 0.3   | 1                    | 0.5   | -            | -     | -             | -     | 1       | 0.2   |

OS denotes ovarian function suppression; LN denotes lymph nodes.

| <b>C<br/>Treatment<br/>Assignment</b> | <b>Chemotherapy<br/>Stratum</b> | <b>Oral ET<br/>Duration<br/>(mos)</b> | <b>Ovarian<br/>Suppression<br/>(mos)</b> | <b>Overall<br/>Survival<br/>(mos)</b> | <b>Cause of Death</b>         |
|---------------------------------------|---------------------------------|---------------------------------------|------------------------------------------|---------------------------------------|-------------------------------|
| Tamoxifen                             | No chemo                        | 32                                    | --                                       | 32                                    | Myocardial infarction         |
| Tamoxifen                             | No chemo                        | 60                                    | --                                       | 75                                    | Myocardial infarction         |
| Tamoxifen                             | Prior chemo                     | 57                                    | --                                       | 129                                   | Cardiogenic shock             |
| Tamoxifen                             | No chemo                        | 45                                    | --                                       | 69                                    | Multiple sclerosis            |
| Tamoxifen                             | Prior chemo                     | 20                                    | --                                       | 20                                    | Other-mixed drug intoxication |
| Tamoxifen                             | Prior chemo                     | 4                                     | --                                       | 4                                     | Unknown cause (confirmed)     |
| Tamoxifen-OS                          | No chemo                        | 0                                     | 0                                        | 64                                    | Unknown cause (confirmed)     |
| Exemestane-OS                         | No chemo                        | 22                                    | 22                                       | 23                                    | Cirrhosis                     |
| Exemestane-OS                         | No chemo                        | 6                                     | 7                                        | 8                                     | Unknown cause (confirmed)     |

Notes: ET denotes endocrine therapy; OS ovarian function suppression. The 3 patients assigned to OS had GnRH agonist triptorelin as only method of OS. In cases of unknown cause (confirmed) of death, the absence of preceding cancer event was confirmed.

**Table S3.** Status of death relative to site of first disease-free survival (DFS) event, according to chemotherapy cohort and treatment assignment, after a median follow-up in SOFT of 8 years.

|                                      | <b>Chemotherapy Cohort</b> |          |                    |          | <b>Treatment Assignment</b> |          |                      |          |                       |          | <b>Overall</b> |          |
|--------------------------------------|----------------------------|----------|--------------------|----------|-----------------------------|----------|----------------------|----------|-----------------------|----------|----------------|----------|
|                                      | <b>No chemo</b>            |          | <b>Prior chemo</b> |          | <b>Tamoxifen</b>            |          | <b>Tamoxifen -OS</b> |          | <b>Exemestane -OS</b> |          |                |          |
|                                      | <b>N</b>                   | <b>%</b> | <b>N</b>           | <b>%</b> | <b>N</b>                    | <b>%</b> | <b>N</b>             | <b>%</b> | <b>N</b>              | <b>%</b> | <b>N</b>       | <b>%</b> |
| <i>N Patients who died</i>           | 24                         | 100.0    | 201                | 100.0    | 88                          | 100.0    | 61                   | 100.0    | 76                    | 100.0    | 225            | 100.0    |
| <b>Status of Death</b>               |                            |          |                    |          |                             |          |                      |          |                       |          |                |          |
| After breast cancer event            | 12                         | 50.0     | 188                | 93.5     | 78                          | 88.6     | 58                   | 95.1     | 64                    | 84.2     | 200            | 88.9     |
| After second (non-breast) malignancy | 5                          | 20.8     | 7                  | 3.5      | 2                           | 2.3      | 2                    | 3.3      | 8                     | 10.5     | 12             | 5.3      |
| Without preceding cancer event       | 6                          | 25.0     | 3                  | 1.5      | 6                           | 6.8      | 1                    | 1.6      | 2                     | 2.6      | 9              | 4.0      |
| Incomplete information               | 1                          | 4.2      | 3                  | 1.5      | 2                           | 2.3      | -                    | -        | 2                     | 2.6      | 4              | 1.8      |

**Table S4.** Final status of protocol-assigned treatment in SOFT, overall and according to chemotherapy cohort and treatment assignment.

| Status of Protocol-assigned Treatment                | Chemotherapy Cohort |       |             |       | Treatment Assignment |       |               |       |                |       | Overall |       |
|------------------------------------------------------|---------------------|-------|-------------|-------|----------------------|-------|---------------|-------|----------------|-------|---------|-------|
|                                                      | No Chemo            |       | Prior Chemo |       | Tamoxifen            |       | Tamoxifen -OS |       | Exemestane -OS |       |         |       |
|                                                      | N                   | %     | N           | %     | N                    | %     | N             | %     | N              | %     | N       | %     |
| <i>No. of Patients</i>                               | 1419                | 100.0 | 1628        | 100.0 | 1018                 | 100.0 | 1015          | 100.0 | 1014           | 100.0 | 3047    | 100.0 |
| <b>Status of protocol-assigned treatment overall</b> |                     |       |             |       |                      |       |               |       |                |       |         |       |
| Last known on protocol-assigned treatment            | 8                   | 0.6   | 11          | 0.7   | 6                    | 0.6   | 7             | 0.7   | 6              | 0.6   | 19      | 0.6   |
| Completed protocol treatment as assigned             | 1119                | 78.9  | 1314        | 80.7  | 771                  | 75.7  | 864           | 85.1  | 798            | 78.7  | 2433    | 79.8  |
| Stopped all protocol-assigned treatment early        | 277                 | 19.5  | 285         | 17.5  | 229                  | 22.5  | 137           | 13.5  | 196            | 19.3  | 562     | 18.4  |
| Never started protocol-assigned treatment            | 15                  | 1.1   | 18          | 1.1   | 12                   | 1.2   | 7             | 0.7   | 14             | 1.4   | 33      | 1.1   |
| <b>Status of protocol-assigned oral ET</b>           |                     |       |             |       |                      |       |               |       |                |       |         |       |
| Last known on assigned oral ET                       | 8                   | 0.6   | 10          | 0.6   | 6                    | 0.6   | 7             | 0.7   | 5              | 0.5   | 18      | 0.6   |
| Completed assigned oral ET                           | 1060                | 74.7  | 1228        | 75.4  | 771                  | 75.7  | 812           | 80.0  | 705            | 69.5  | 2288    | 75.1  |
| Stopped assigned oral ET early                       | 332                 | 23.4  | 367         | 22.5  | 229                  | 22.5  | 188           | 18.5  | 282            | 27.8  | 699     | 22.9  |
| Never started assigned oral ET                       | 19                  | 1.3   | 23          | 1.4   | 12                   | 1.2   | 8             | 0.8   | 22             | 2.2   | 42      | 1.4   |
| <b>Status of induced ovarian suppression</b>         |                     |       |             |       |                      |       |               |       |                |       |         |       |
| Last known on GnRH agonist                           | 6                   | 0.4   | 11          | 0.7   | -                    | -     | 8             | 0.8   | 9              | 0.9   | 17      | 0.6   |
| Completed OS                                         | 697                 | 49.1  | 849         | 52.1  | -                    | -     | 764           | 75.3  | 782            | 77.1  | 1546    | 50.7  |
| Stopped GnRH agonist early                           | 216                 | 15.2  | 214         | 13.1  | -                    | -     | 223           | 22.0  | 207            | 20.4  | 430     | 14.1  |
| OS never started                                     | 24                  | 1.7   | 12          | 0.7   | -                    | -     | 20            | 2.0   | 16             | 1.6   | 36      | 1.2   |
| N/A (SOFT tam alone)                                 | 476                 | 33.5  | 542         | 33.3  | 1018                 | 100.0 | -             | -     | -              | -     | 1018    | 33.4  |

Notes: ET denotes endocrine therapy.

OS: ovarian function suppression was GnRH agonist (triptorelin) intramuscular injection every 28 days, bilateral oophorectomy or bilateral ovarian irradiation; the choice of GnRH agonist, bilateral oophorectomy or bilateral ovarian irradiation was by patient preference and patients who began with GnRH agonist could opt to undergo ovarian surgery or irradiation at any time. In total 369/2029 (18.2%) of patients assigned to OS opted to undergo bilateral oophorectomy or bilateral ovarian irradiation at some point during adjuvant therapy.

For patients randomized to exemestane-OS, exemestane was to begin 6 to 8 weeks after initiation of OS to allow a decline in ovarian estrogen production, and patients who had been taking tamoxifen at the time of randomization were permitted to continue tamoxifen until exemestane was initiated.

Tamoxifen was to start at randomization and continue for 5 years from date of randomization.

Protocol-assigned endocrine therapy continued for 5 years from the date of randomization, and the protocol did not address the issue of extended adjuvant endocrine therapy beyond 5 years.

### III. C. Efficacy of Exemestane Compared with Tamoxifen when Treated with Ovarian Suppression Figures and Tables

#### Figure S5. Randomization, Treatment and Follow-up for the Combined SOFT and TEXT Population.

CONSORT flow diagram showing the intention-to-treat population of 4717 patients included in the analysis. During follow-up, 577 of 4717 patients either withdrew consent or were lost to follow-up and were censored at date of last follow-up visit (median time to withdrawal or lost was 3.0 years [interquartile range, 1.0-5.5 years]); for 198 of 577 patients, the patient consented to continued submission of disease-recurrence and survival status from medical records or such updates were obtainable from tumor and vital registries according to protocol follow-up schedule and overall survival is censored at date last known alive (median follow-up 8.6 years [interquartile range, 6.4-9.9 years]).

SOFT denotes Suppression of Ovarian Function Trial, TEXT Tamoxifen and Exemestane Trial, E exemestane, T tamoxifen, OS ovarian suppression, ITT intention-to-treat.

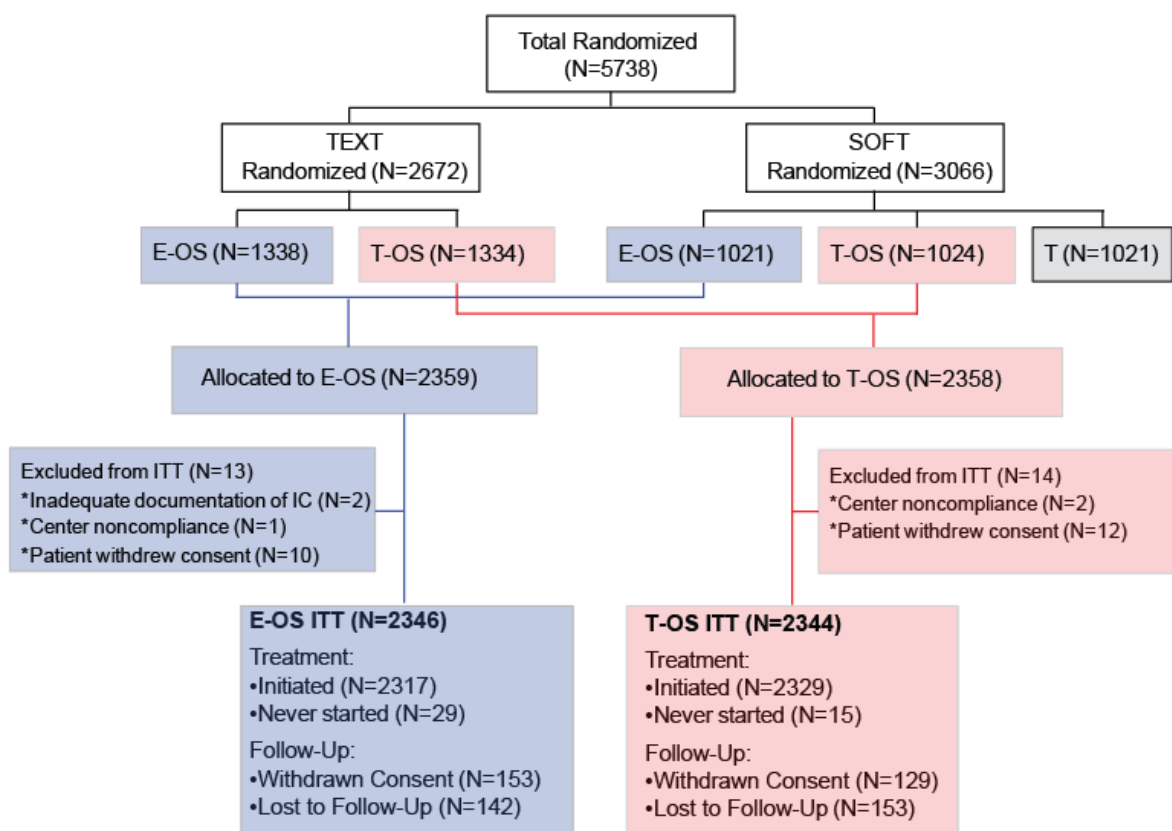

**Figure S6. Results of Cox Proportional-hazards Models for the Disease-free Survival (DFS) Treatment Comparison of Exemestane Plus Ovarian Suppression vs. Tamoxifen Plus Ovarian Suppression, among All Patients and According to Subgroups in the Combined SOFT and TEXT Population.**

The solid vertical line at 0.77 indicates the overall hazard-ratio estimate (the hazard ratio is for disease recurrence, second invasive cancer, or death). The 8-year values are Kaplan-Meier estimates of DFS. The x-axis is scaled according to the natural logarithm of the hazard ratio. The size of the squares is inversely proportional to the standard error of the hazard ratio. The median follow-up was 9 years.

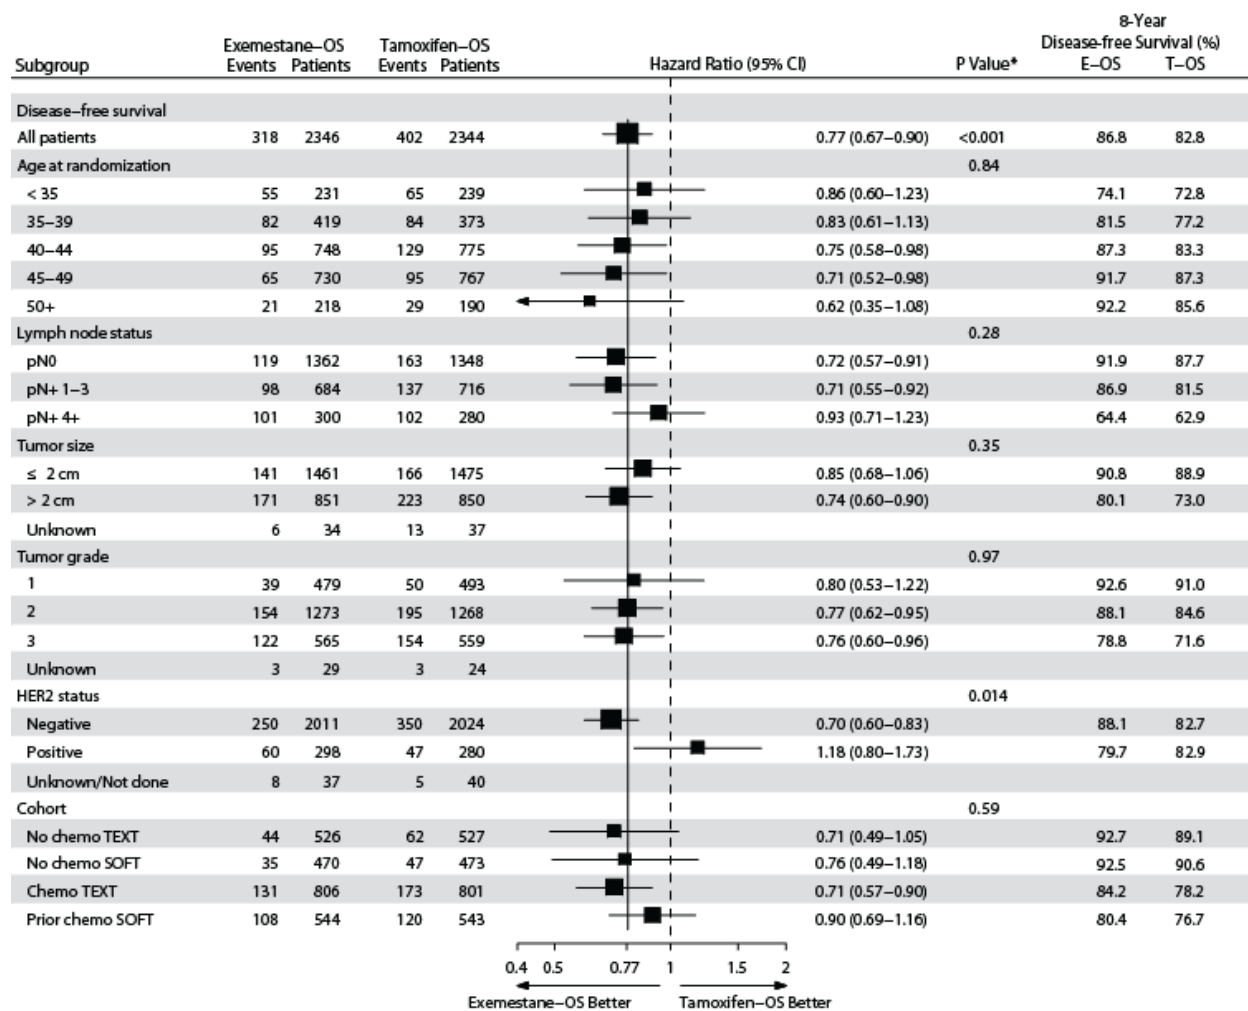

\*P-value for “All Patients” is the stratified log-rank test; for other variables, P-value is test of heterogeneity of the treatment effect across subgroups, using test of treatment-by-variable interaction from stratified Cox model, with “Unknown” or “Unknown/Not done” group omitted from the test.

Abbreviations: CI denotes confidence interval, E exemestane, T tamoxifen, OS ovarian suppression.



**Figure S7A. Kaplan-Meier Estimates of Disease-free Survival, Freedom from Recurrence of Breast Cancer, Freedom from Recurrence of Breast Cancer at a Distant Site, and Overall Survival after a Median Follow-up of 9 Years in the Combined SOFT and TEXT Population.**

The hazard ratio in Panel A is for disease recurrence, second invasive cancer, or death. In Panels B and C the hazard ratios are for recurrence of breast cancer and recurrence of breast cancer at a distant site, respectively. The hazard ratio in Panel D is for death. The 8-year values are based on Kaplan-Meier estimates of the time to an event.

**Figure S7B. Kaplan-Meier estimates of (A,B) disease-free survival, (C,D) freedom from breast cancer, (E,F) freedom from breast cancer at a distant site, and (G,H) overall survival, according to treatment assignment, among cohorts of patients who were selected to receive chemotherapy.**

**Figure S7C. Kaplan-Meier estimates of (A,B) disease-free survival, (C,D) freedom from breast cancer, (E,F) freedom from breast cancer at a distant site, and (G,H) overall survival, according to treatment assignment, among cohorts of patients who did not receive chemotherapy.**

Abbreviations: CI denotes confidence interval, E exemestane, HR hazard ratio, OS ovarian suppression, pts patients, T tamoxifen.

Figure S7A

## A Disease-free Survival

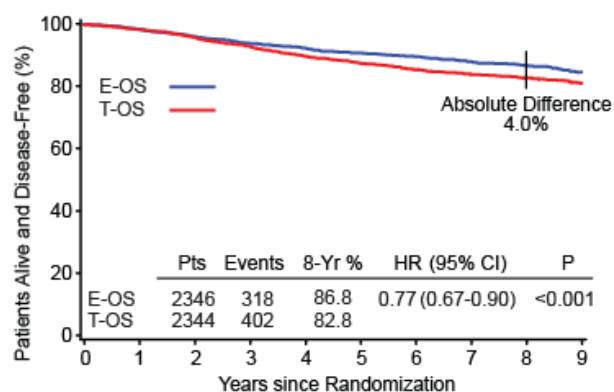

## Number at Risk

|      | 0    | 1    | 2    | 3    | 4    | 5   | 6 | 7 | 8 | 9 |
|------|------|------|------|------|------|-----|---|---|---|---|
| E-OS | 2232 | 2232 | 2073 | 1931 | 1391 | 861 |   |   |   |   |
| T-OS | 2257 | 2257 | 2066 | 1866 | 1337 | 834 |   |   |   |   |

## B Freedom from Breast Cancer

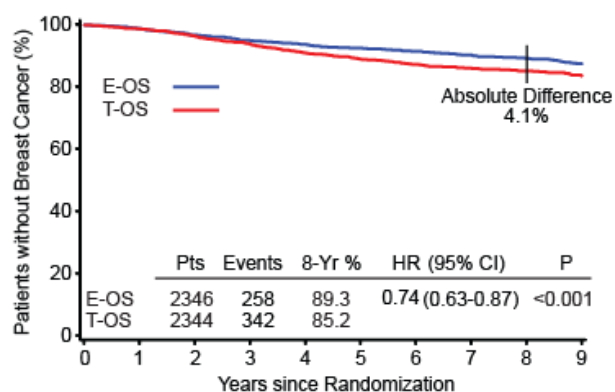

|      | 0    | 1    | 2    | 3    | 4    | 5   | 6 | 7 | 8 | 9 |
|------|------|------|------|------|------|-----|---|---|---|---|
| E-OS | 2237 | 2237 | 2087 | 1953 | 1410 | 881 |   |   |   |   |
| T-OS | 2261 | 2261 | 2078 | 1890 | 1364 | 853 |   |   |   |   |

## C Freedom from Distant Recurrence

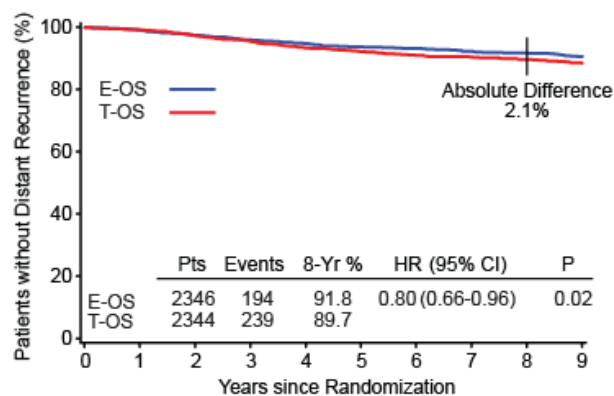

## Number at Risk

|      | 0    | 1    | 2    | 3    | 4    | 5   | 6 | 7 | 8 | 9 |
|------|------|------|------|------|------|-----|---|---|---|---|
| E-OS | 2245 | 2245 | 2109 | 1977 | 1437 | 909 |   |   |   |   |
| T-OS | 2271 | 2271 | 2110 | 1955 | 1421 | 897 |   |   |   |   |

## D Overall Survival

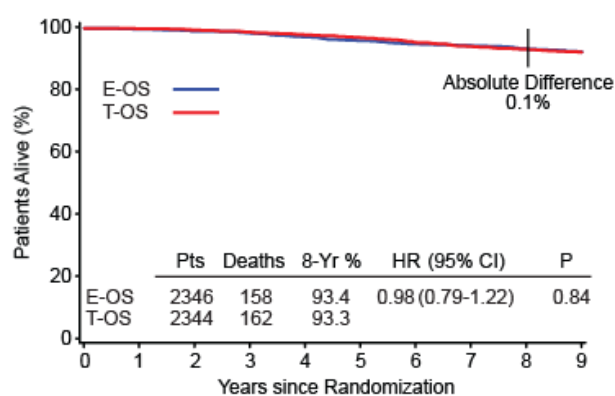

|      | 0    | 1    | 2    | 3    | 4    | 5   | 6 | 7 | 8 | 9 |
|------|------|------|------|------|------|-----|---|---|---|---|
| E-OS | 2289 | 2289 | 2224 | 2101 | 1551 | 988 |   |   |   |   |
| T-OS | 2308 | 2308 | 2238 | 2123 | 1547 | 988 |   |   |   |   |

Figure S7B

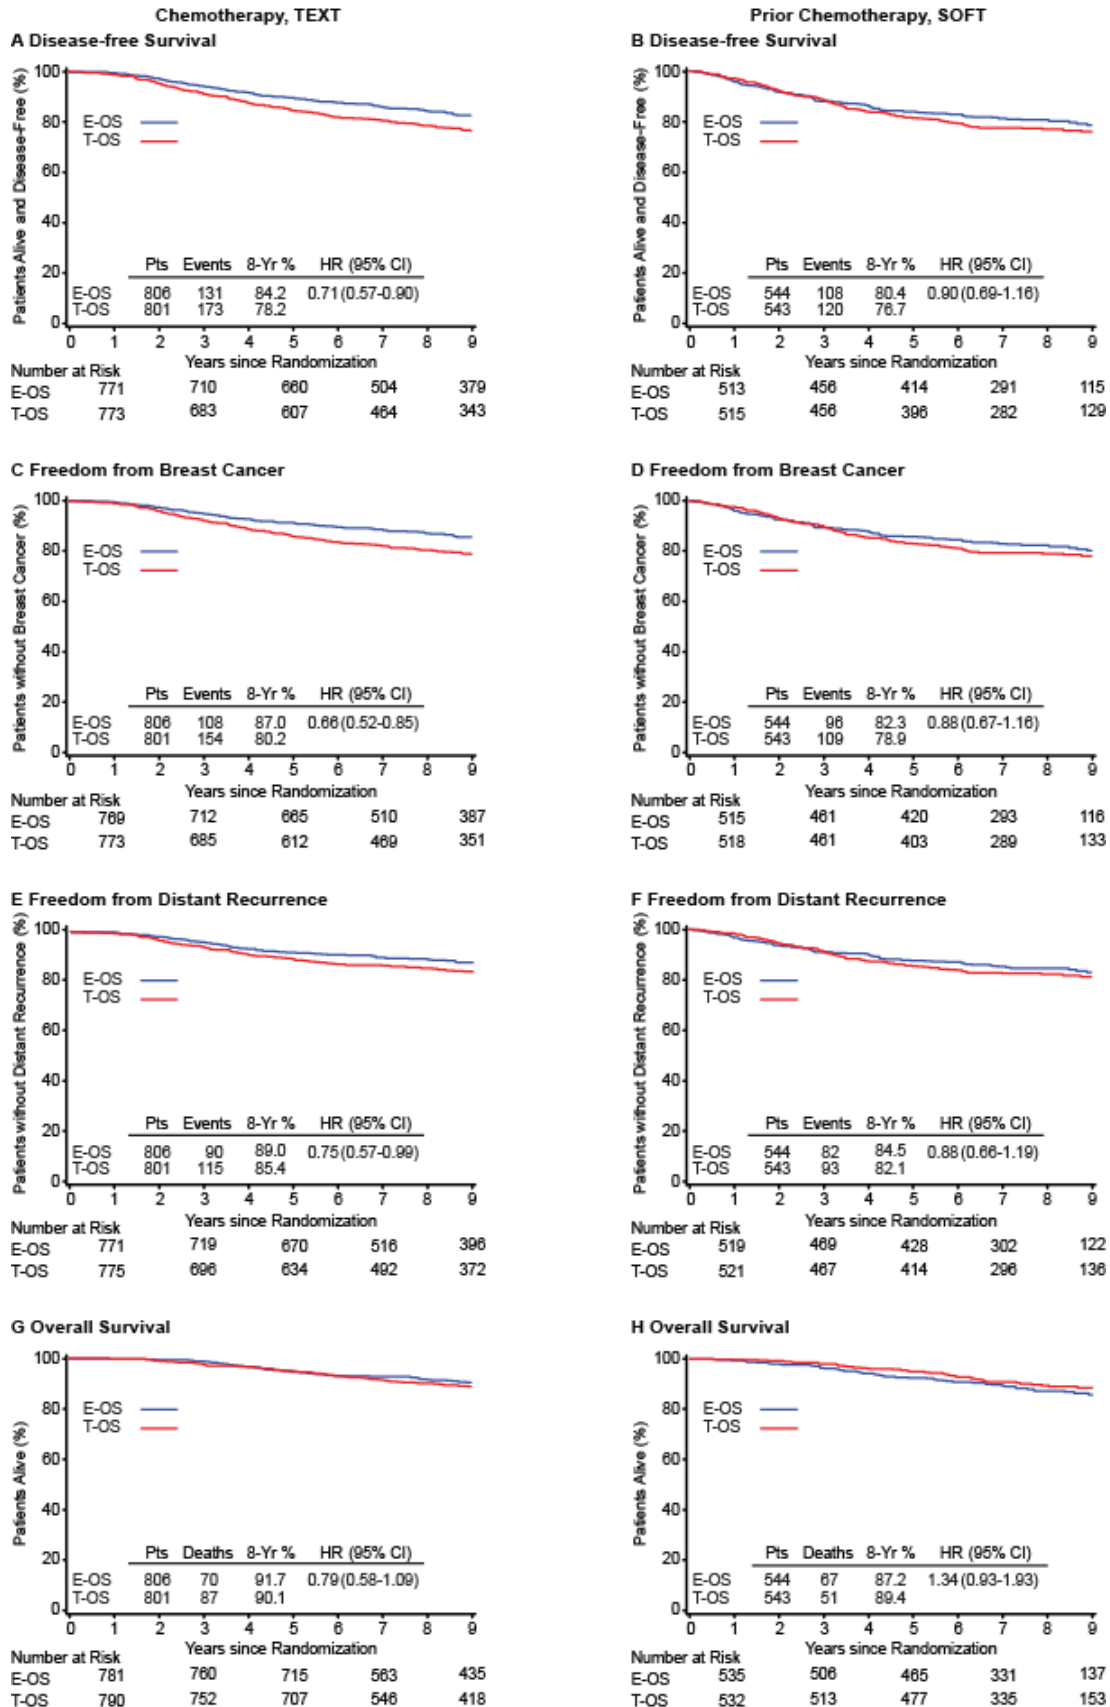

Figure S7C

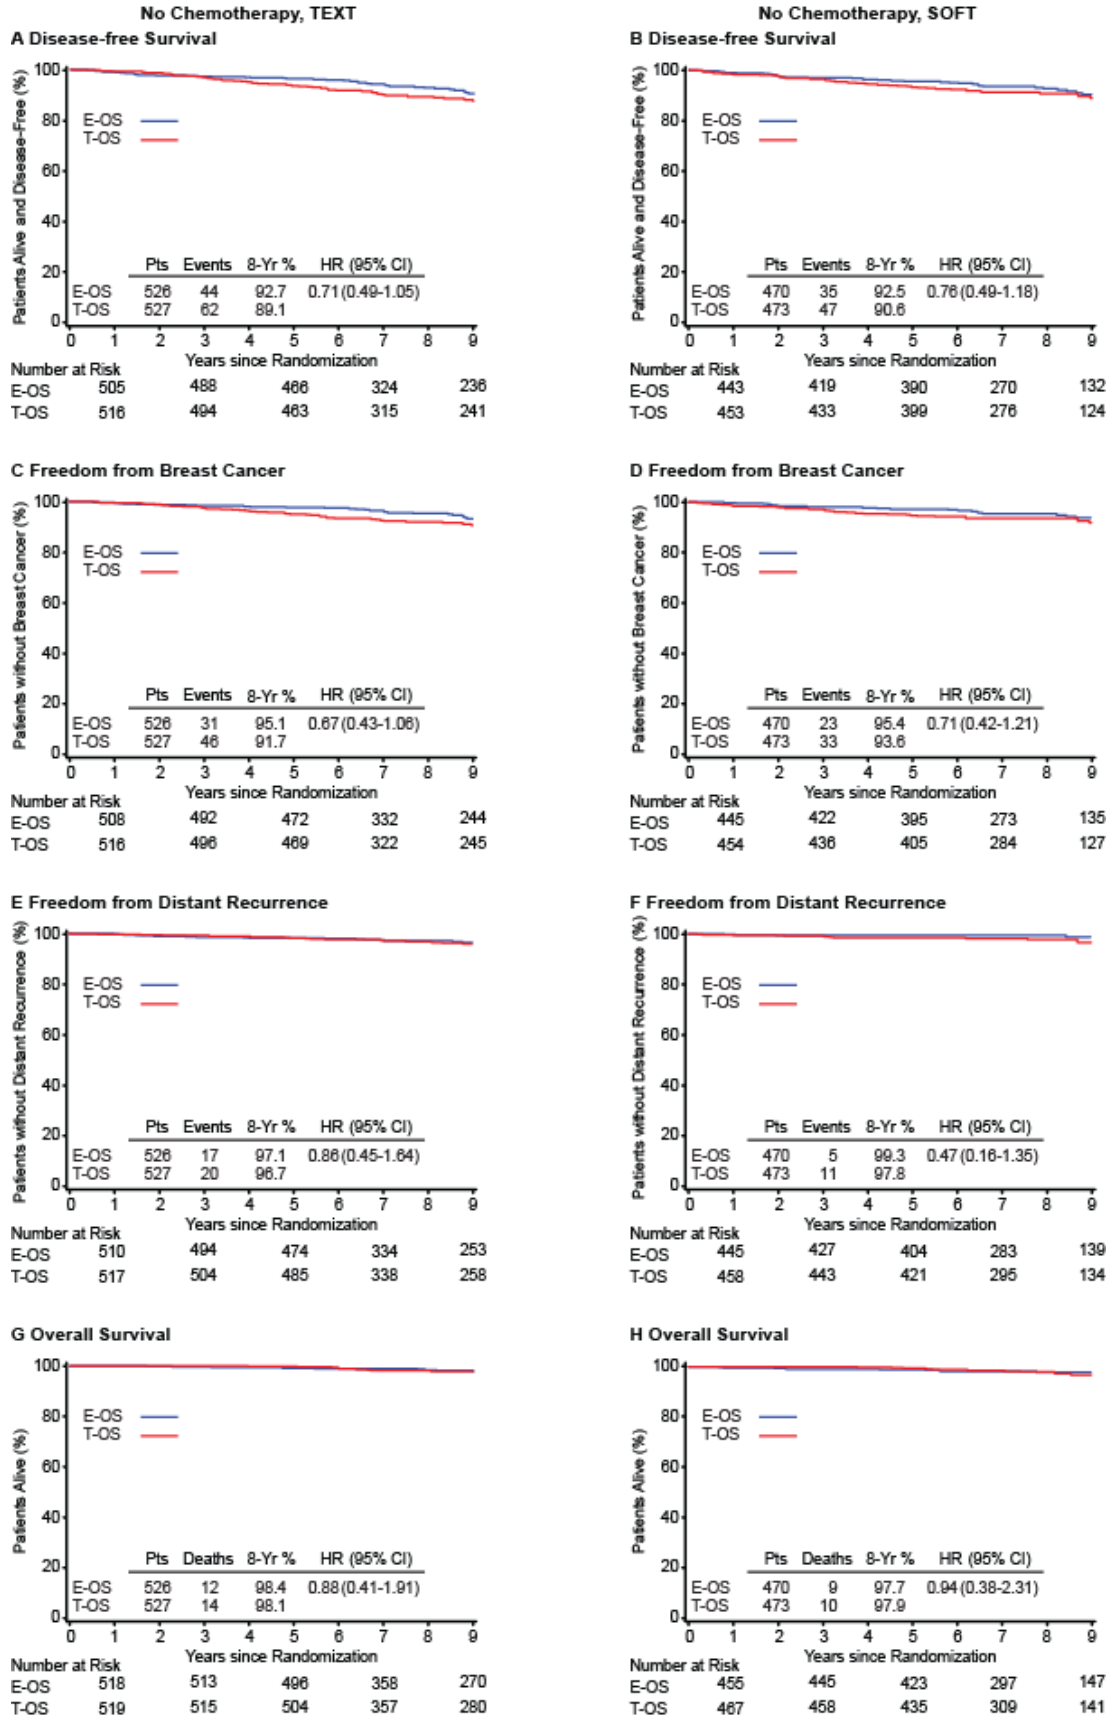

**Figure S8. Results of Cox Proportional-hazards Models for the Treatment Comparisons of Freedom from Recurrence of Breast Cancer at a Distant Site, among All Patients with HER2-negative Disease and According to Subgroups in the Combined SOFT and TEXT Population.**

The solid vertical line at 0.69 indicates the overall hazard-ratio estimate for recurrence of breast cancer at a distant site for all patients having HER2-negative disease. The 8-year values are based on Kaplan-Meier estimates of freedom from distant recurrence. The x-axis is scaled according to the natural logarithm of the hazard ratio. The size of the squares is inversely proportional to the standard error of the hazard ratio. The median follow-up was 9 years.

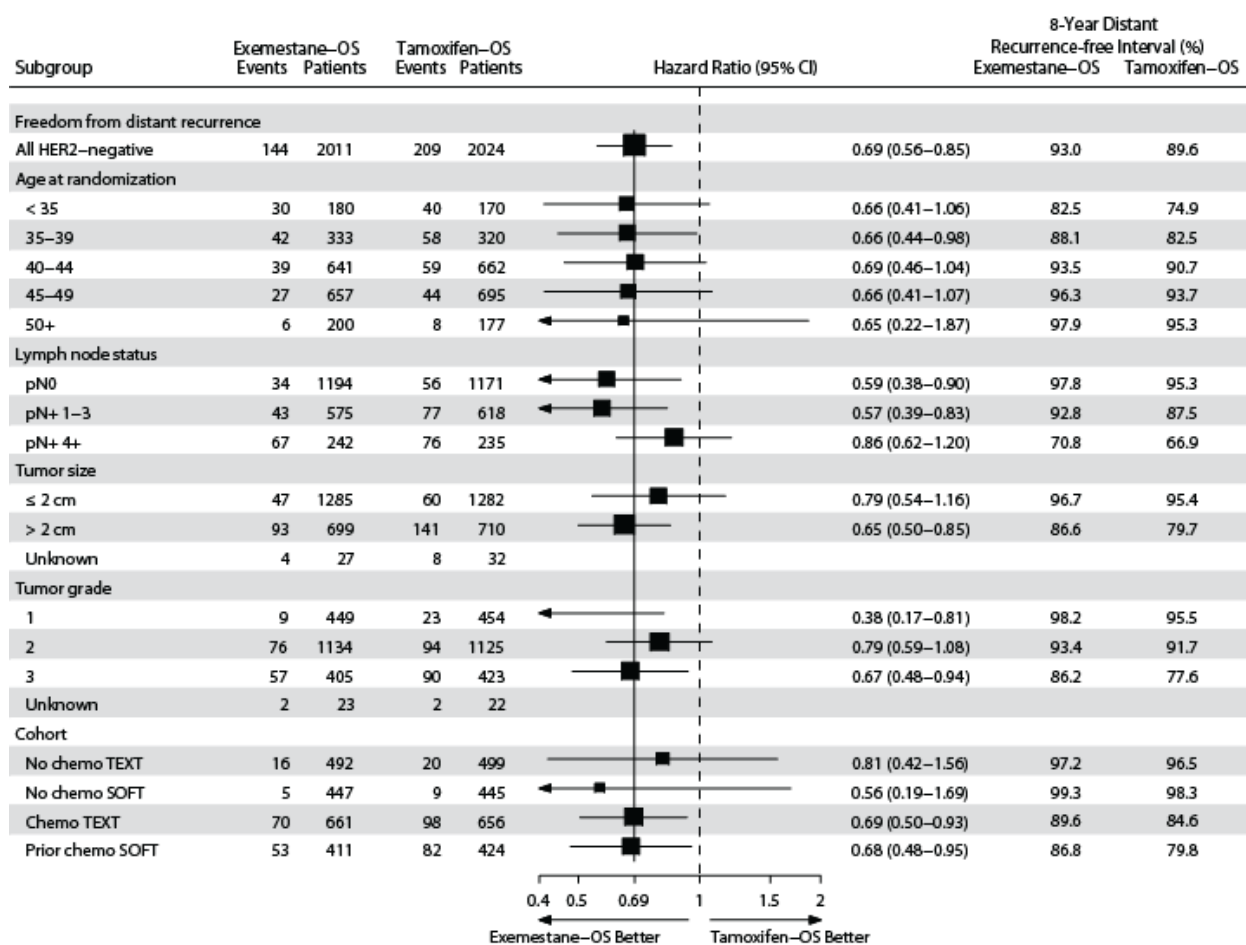

Note: Tests of heterogeneity of the treatment effect across subgroups were not performed within this subgroup of patients having HER2-negative disease. Widths of CIs were not adjusted for multiplicity of testing. Inference from these analyses should be viewed as preliminary.

Abbreviations: OS denotes ovarian suppression, CI confidence interval.

**Figure S9. Results of Cox Proportional-hazards Models for the Treatment Comparisons of Four End Points, among Patients in the Combined SOFT and TEXT Population with HER2-negative Disease, Overall and According to Cohort.**

The solid vertical lines at 0.70, 0.66, 0.69, and 0.86 indicate the overall hazard-ratio estimates for the four endpoints of disease-free survival (hazard ratio for disease recurrence, second invasive cancer, or death), freedom from recurrence of breast cancer (hazard ratio for recurrence), freedom from recurrence of breast cancer at a distant site (hazard ratio for recurrence), and overall survival (hazard ratio for death), respectively. The 8-year values are based on Kaplan-Meier estimates of the time to an event. The x-axis is scaled according to the natural logarithm of the hazard ratio. The size of the squares is inversely proportional to the standard error of the hazard ratio. The median follow-up was 9 years in the combined SOFT and TEXT population.

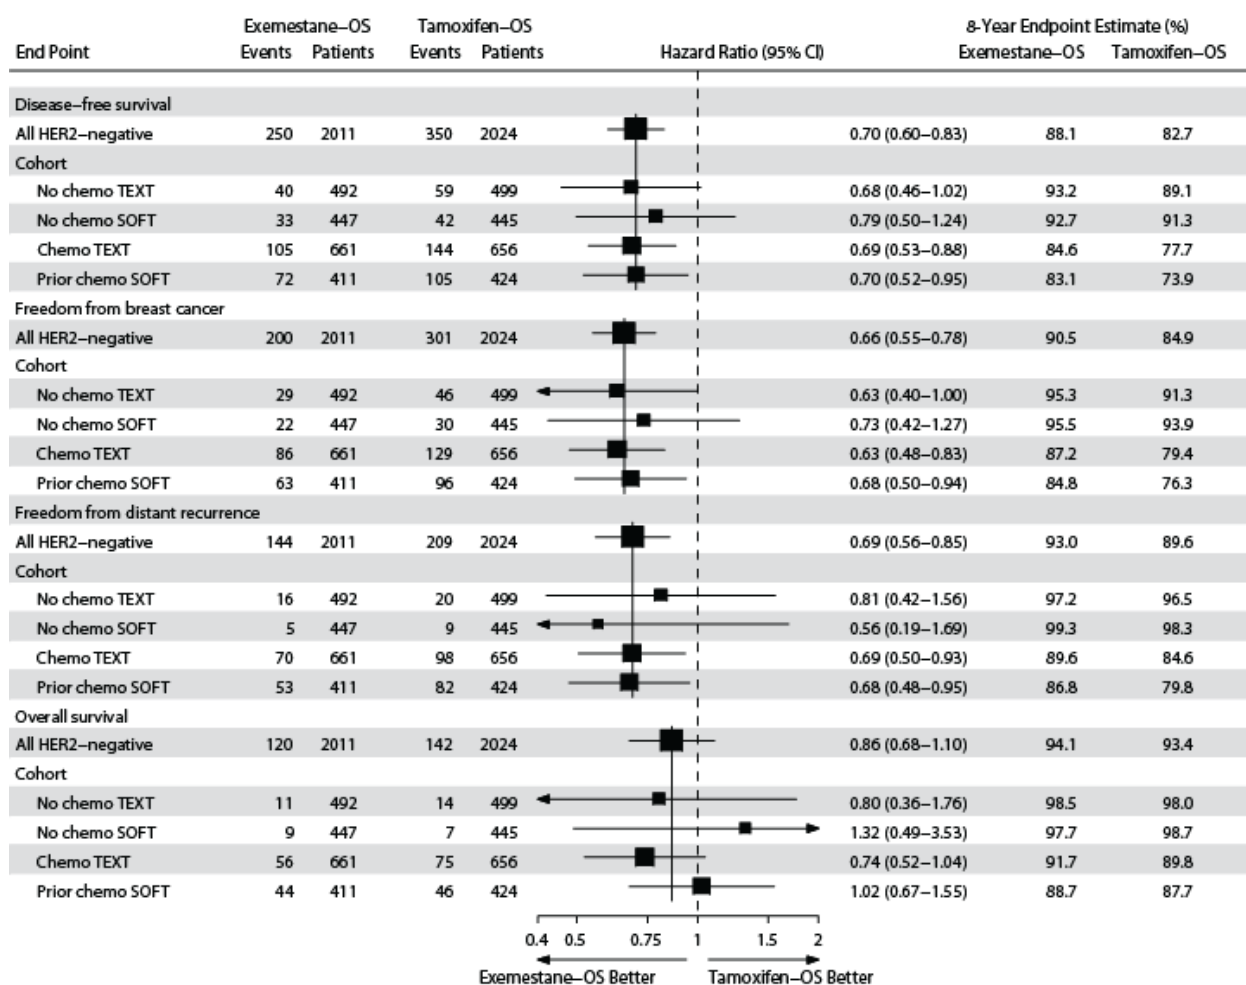

Note: Tests of heterogeneity of the treatment effect across cohorts were not performed within this subgroup of patients having HER2-negative disease. Widths of CIs were not adjusted for multiplicity of testing. Inference from these analyses should be viewed as preliminary.

Abbreviations: OS denotes ovarian suppression, CI confidence interval.

**Figure S10. Results of Cox Proportional-hazards Models for the Treatment Comparisons of Four End Points, among 578 Patients in the Combined SOFT and TEXT Population with HER2-positive Disease, Overall and according to Cohort.**

The solid vertical lines at 1.18, 1.22, 1.46, and 1.91 indicate the overall hazard-ratio estimates for the four endpoints, respectively. In the analysis of disease-free survival, the hazard ratio is for disease recurrence, second invasive cancer, or death. In the analyses of freedom from recurrence of breast cancer and freedom from recurrence of breast cancer at a distant site, the hazard ratios are for disease recurrence. In the overall survival analysis, the hazard ratio is for death. The 8-year values are based on Kaplan-Meier estimates of the time to an event. The x-axis is scaled according to the natural logarithm of the hazard ratio. The size of the squares is inversely proportional to the standard error of the hazard ratio. The median follow-up was 9 years.

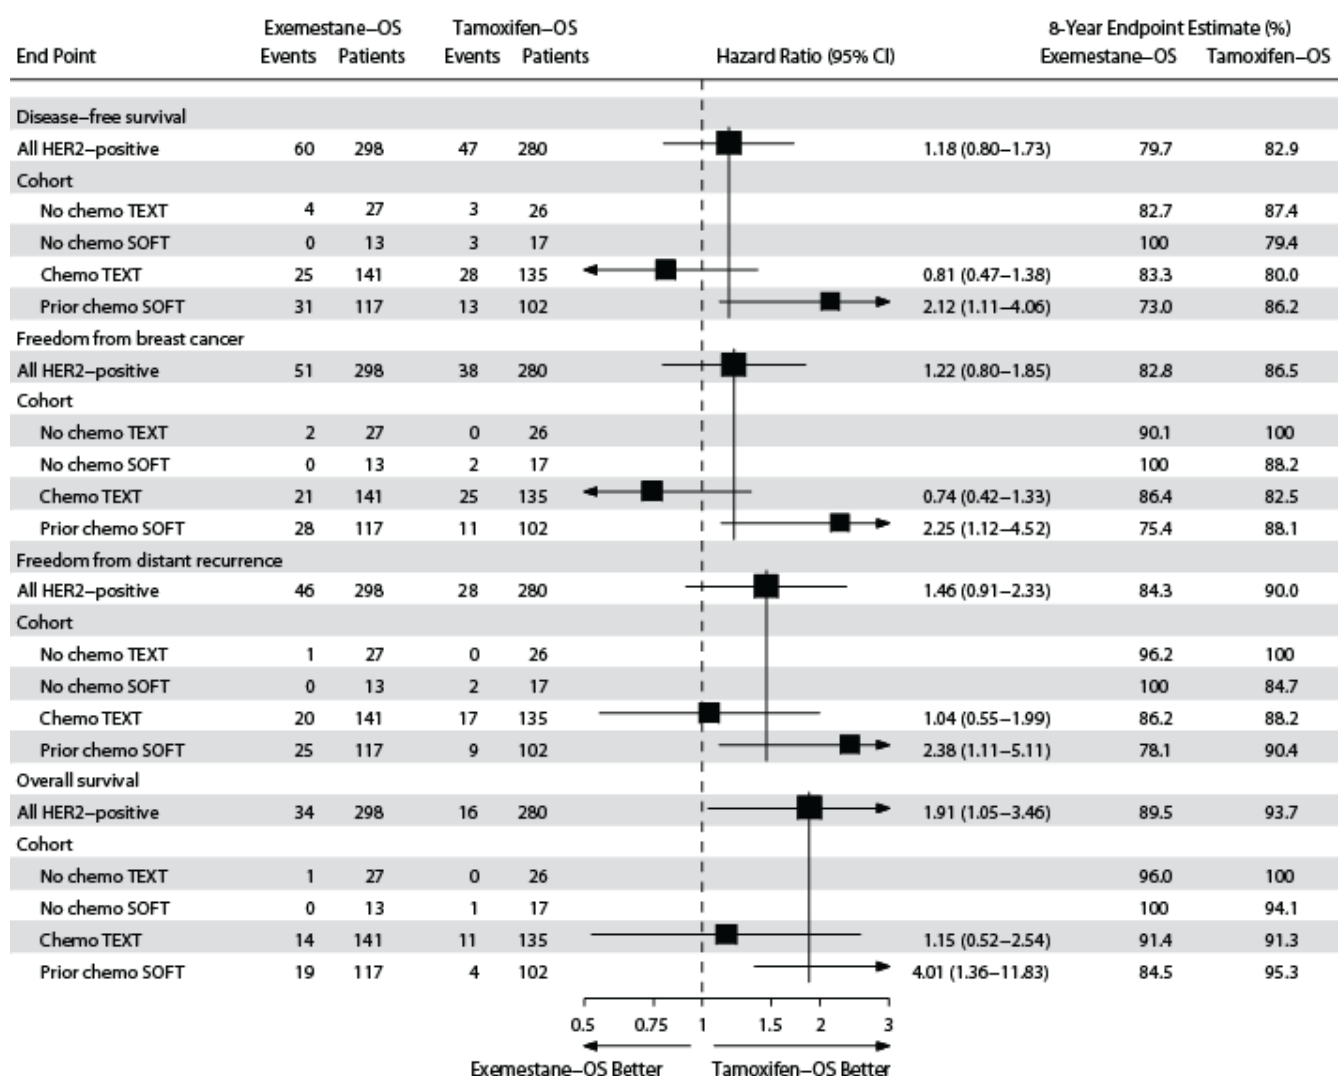

Note: Tests of heterogeneity of the treatment effect across cohorts were not performed within this subgroup of patients having HER2-positive disease. Widths of CIs were not adjusted for multiplicity of testing. Inference from these analyses should be viewed as preliminary.

Abbreviations: OS denotes ovarian suppression, CI confidence interval.

**Table S5.** Kaplan-Meier estimates of 8-year end point rates with 95% confidence intervals, according to treatment assignment in the combined SOFT & TEXT population, overall and by HER2 status and cohort. Bolded values are those reported in the manuscript text.

| End point | HER2             | Cohort           | Exemestane-OS |            |               |              |              | Tamoxifen-OS |            |               |              |              |
|-----------|------------------|------------------|---------------|------------|---------------|--------------|--------------|--------------|------------|---------------|--------------|--------------|
|           |                  |                  | N Pts         | N Events   | 8-yr Rate (%) | 95% Lower CI | 95% Upper CI | N Pts        | N Events   | 8-yr Rate (%) | 95% Lower CI | 95% Upper CI |
| DFS       | Overall          | Overall          | <b>2346</b>   | <b>318</b> | <b>86.8</b>   | <b>85.3</b>  | <b>88.2</b>  | <b>2344</b>  | <b>402</b> | <b>82.8</b>   | <b>81.1</b>  | <b>84.3</b>  |
|           |                  | No chemo TEXT    | 526           | 44         | 92.7          | 89.8         | 94.8         | 527          | 62         | 89.1          | 85.8         | 91.6         |
|           |                  | No chemo SOFT    | 470           | 35         | 92.5          | 89.3         | 94.8         | 473          | 47         | 90.6          | 87.3         | 93.0         |
|           |                  | Chemo TEXT       | 806           | 131        | 84.2          | 81.3         | 86.7         | 801          | 173        | 78.2          | 75.0         | 81.1         |
|           |                  | Prior chemo SOFT | 544           | 108        | 80.4          | 76.6         | 83.7         | 543          | 120        | 76.7          | 72.7         | 80.2         |
|           | Negative         | Overall          | <b>2011</b>   | <b>250</b> | <b>88.1</b>   | <b>86.5</b>  | <b>89.6</b>  | <b>2024</b>  | <b>350</b> | <b>82.7</b>   | <b>80.9</b>  | <b>84.4</b>  |
|           |                  | No chemo TEXT    | 492           | 40         | 93.2          | 90.2         | 95.3         | 499          | 59         | 89.1          | 85.8         | 91.7         |
|           |                  | No chemo SOFT    | 447           | 33         | 92.7          | 89.5         | 95.0         | 445          | 42         | 91.3          | 88.1         | 93.7         |
|           |                  | Chemo TEXT       | 661           | 105        | 84.6          | 81.3         | 87.3         | 656          | 144        | 77.7          | 74.0         | 80.9         |
|           |                  | Prior chemo SOFT | 411           | 72         | 83.1          | 78.8         | 86.5         | 424          | 105        | 73.9          | 69.1         | 78.0         |
|           | Positive         | Overall          | 298           | 60         | 79.7          | 74.4         | 84.0         | 280          | 47         | 82.9          | 77.6         | 87.0         |
|           |                  | No chemo TEXT    | 27            | 4          | -             | -            | -            | 26           | 3          | -             | -            | -            |
|           |                  | No chemo SOFT    | 13            | 0          | -             | -            | -            | 17           | 3          | -             | -            | -            |
|           |                  | Chemo TEXT       | 141           | 25         | 83.3          | 75.8         | 88.7         | 135          | 28         | 80.0          | 71.8         | 86.1         |
|           |                  | Prior chemo SOFT | 117           | 31         | 73.0          | 63.6         | 80.3         | 102          | 13         | 86.2          | 77.4         | 91.8         |
|           | Unknown/Not done | Overall          | 37            | 8          | -             | -            | -            | 40           | 5          | -             | -            | -            |
|           |                  | No chemo TEXT    | 7             | 0          | -             | -            | -            | 2            | 0          | -             | -            | -            |
|           |                  | No chemo SOFT    | 10            | 2          | -             | -            | -            | 11           | 2          | -             | -            | -            |
|           |                  | Chemo TEXT       | 4             | 1          | -             | -            | -            | 10           | 1          | -             | -            | -            |
|           |                  | Prior chemo SOFT | 16            | 5          | -             | -            | -            | 17           | 2          | -             | -            | -            |
| BCFI      | Overall          | Overall          | 2346          | 258        | 89.3          | 87.9         | 90.6         | 2344         | 342        | 85.2          | 83.6         | 86.7         |
|           |                  | No chemo TEXT    | 526           | 31         | 95.1          | 92.6         | 96.8         | 527          | 46         | 91.7          | 88.8         | 93.9         |
|           |                  | No chemo SOFT    | 470           | 23         | 95.4          | 92.8         | 97.1         | 473          | 33         | 93.6          | 90.9         | 95.6         |
|           |                  | Chemo TEXT       | 806           | 108        | 87.0          | 84.2         | 89.3         | 801          | 154        | 80.2          | 77.1         | 83.0         |
|           |                  | Prior chemo SOFT | 544           | 96         | 82.3          | 78.6         | 85.4         | 543          | 109        | 78.9          | 75.0         | 82.3         |
|           | Negative         | Overall          | 2011          | 200        | 90.5          | 89.0         | 91.8         | 2024         | 301        | 84.9          | 83.1         | 86.5         |
|           |                  | No chemo TEXT    | 492           | 29         | 95.3          | 92.7         | 97.0         | 499          | 46         | 91.3          | 88.2         | 93.6         |
|           |                  | No chemo SOFT    | 447           | 22         | 95.5          | 92.8         | 97.2         | 445          | 30         | 93.9          | 91.1         | 95.9         |
|           |                  | Chemo TEXT       | 661           | 86         | 87.2          | 84.2         | 89.7         | 656          | 129        | 79.4          | 75.9         | 82.5         |
|           |                  | Prior chemo SOFT | 411           | 63         | 84.8          | 80.6         | 88.1         | 424          | 96         | 76.3          | 71.7         | 80.3         |
|           | Positive         | Overall          | 298           | 51         | 82.8          | 77.8         | 86.8         | 280          | 38         | 86.5          | 81.7         | 90.1         |
|           |                  | No chemo TEXT    | 27            | 2          | -             | -            | -            | 26           | 0          | -             | -            | -            |
|           |                  | No chemo SOFT    | 13            | 0          | -             | -            | -            | 17           | 2          | -             | -            | -            |
|           |                  | Chemo TEXT       | 141           | 21         | 86.4          | 79.3         | 91.2         | 135          | 25         | 82.5          | 74.6         | 88.1         |
|           |                  | Prior chemo SOFT | 117           | 28         | 75.4          | 66.2         | 82.5         | 102          | 11         | 88.1          | 79.5         | 93.2         |
|           | Unknown/Not done | Overall          | 37            | 7          | -             | -            | -            | 40           | 3          | -             | -            | -            |
|           |                  | No chemo TEXT    | 7             | 0          | -             | -            | -            | 2            | 0          | -             | -            | -            |
|           |                  | No chemo SOFT    | 10            | 1          | -             | -            | -            | 11           | 1          | -             | -            | -            |
|           |                  | Chemo TEXT       | 4             | 1          | -             | -            | -            | 10           | 0          | -             | -            | -            |
|           |                  | Prior chemo SOFT | 16            | 5          | -             | -            | -            | 17           | 2          | -             | -            | -            |
| DRFI      | Overall          | Overall          | <b>2346</b>   | <b>194</b> | <b>91.8</b>   | <b>90.5</b>  | <b>92.9</b>  | <b>2344</b>  | <b>239</b> | <b>89.7</b>   | <b>88.3</b>  | <b>90.9</b>  |
|           |                  | No chemo TEXT    | 526           | 17         | 97.1          | 95.1         | 98.3         | 527          | 20         | 96.7          | 94.6         | 98.0         |
|           |                  | No chemo SOFT    | 470           | 5          | 99.3          | 97.9         | 99.8         | 473          | 11         | 97.8          | 95.7         | 98.9         |
|           |                  | Chemo TEXT       | 806           | 90         | 89.0          | 86.5         | 91.1         | 801          | 115        | 85.4          | 82.6         | 87.8         |
|           |                  | Prior chemo SOFT | 544           | 82         | 84.5          | 81.0         | 87.5         | 543          | 93         | 82.1          | 78.3         | 85.2         |
|           | Negative         | Overall          | <b>2011</b>   | <b>144</b> | <b>93.0</b>   | <b>91.7</b>  | <b>94.1</b>  | <b>2024</b>  | <b>209</b> | <b>89.6</b>   | <b>88.0</b>  | <b>90.9</b>  |
|           |                  | No chemo TEXT    | 492           | 16         | 97.2          | 95.0         | 98.4         | 499          | 20         | 96.5          | 94.3         | 97.9         |
|           |                  | No chemo SOFT    | 447           | 5          | 99.3          | 97.8         | 99.8         | 445          | 9          | 98.3          | 96.4         | 99.2         |
|           |                  | Chemo TEXT       | 661           | 70         | 89.6          | 86.8         | 91.8         | 656          | 98         | 84.6          | 81.4         | 87.3         |
|           |                  | Prior chemo SOFT | 411           | 53         | 86.8          | 82.8         | 89.9         | 424          | 82         | 79.8          | 75.3         | 83.5         |
|           | Positive         | Overall          | 298           | 46         | 84.3          | 79.4         | 88.1         | 280          | 28         | 90.0          | 85.6         | 93.1         |
|           |                  | No chemo TEXT    | 27            | 1          | -             | -            | -            | 26           | 0          | -             | -            | -            |
|           |                  | No chemo SOFT    | 13            | 0          | -             | -            | -            | 17           | 2          | -             | -            | -            |
|           |                  | Chemo TEXT       | 141           | 20         | 86.2          | 79.0         | 91.1         | 135          | 17         | 88.2          | 81.2         | 92.7         |
|           |                  | Prior chemo SOFT | 117           | 25         | 78.1          | 69.0         | 84.8         | 102          | 9          | 90.4          | 82.4         | 94.9         |
|           | Unknown/Not done | Overall          | 37            | 4          | -             | -            | -            | 40           | 2          | -             | -            | -            |
|           |                  | No chemo TEXT    | 7             | 0          | -             | -            | -            | 2            | 0          | -             | -            | -            |
|           |                  | No chemo SOFT    | 10            | 0          | -             | -            | -            | 11           | 0          | -             | -            | -            |
|           |                  | Chemo TEXT       | 4             | 0          | -             | -            | -            | 10           | 0          | -             | -            | -            |
|           |                  | Prior chemo SOFT | 16            | 4          | -             | -            | -            | 17           | 2          | -             | -            | -            |



|    |                  |                  | Exemestane-OS |            |               |              |              | Tamoxifen-OS |            |               |              |              |
|----|------------------|------------------|---------------|------------|---------------|--------------|--------------|--------------|------------|---------------|--------------|--------------|
|    |                  |                  | N Pts         | N Events   | 8-yr Rate (%) | 95% Lower CI | 95% Upper CI | N Pts        | N Events   | 8-yr Rate (%) | 95% Lower CI | 95% Upper CI |
| OS | Overall          | Overall          | <b>2346</b>   | <b>158</b> | <b>93.4</b>   | <b>92.2</b>  | <b>94.4</b>  | <b>2344</b>  | <b>162</b> | <b>93.3</b>   | <b>92.1</b>  | <b>94.3</b>  |
|    |                  | No chemo TEXT    | 526           | 12         | 98.4          | 96.7         | 99.3         | 527          | 14         | 98.1          | 96.3         | 99.1         |
|    |                  | No chemo SOFT    | 470           | 9          | 97.7          | 95.6         | 98.8         | 473          | 10         | 97.9          | 95.7         | 98.9         |
|    |                  | Chemo TEXT       | 806           | 70         | 91.7          | 89.4         | 93.5         | 801          | 87         | 90.1          | 87.6         | 92.1         |
|    | Negative         | Prior chemo SOFT | 544           | 67         | 87.2          | 83.8         | 90.0         | 543          | 51         | 89.4          | 86.1         | 91.9         |
|    |                  | Overall          | <b>2011</b>   | <b>120</b> | <b>94.1</b>   | <b>92.9</b>  | <b>95.1</b>  | <b>2024</b>  | <b>142</b> | <b>93.4</b>   | <b>92.1</b>  | <b>94.5</b>  |
|    |                  | No chemo TEXT    | 492           | 11         | 98.5          | 96.7         | 99.4         | 499          | 14         | 98.0          | 96.1         | 99.0         |
|    |                  | No chemo SOFT    | 447           | 9          | 97.7          | 95.5         | 98.8         | 445          | 7          | 98.7          | 97.0         | 99.5         |
|    |                  | Chemo TEXT       | 661           | 56         | 91.7          | 89.1         | 93.6         | 656          | 75         | 89.8          | 87.0         | 92.1         |
|    | Positive         | Prior chemo SOFT | 411           | 44         | 88.7          | 84.8         | 91.7         | 424          | 46         | 87.7          | 83.7         | 90.8         |
|    |                  | Overall          | 298           | 34         | 89.5          | 85.1         | 92.7         | 280          | 16         | 93.7          | 89.9         | 96.1         |
|    |                  | No chemo TEXT    | 27            | 1          | -             | -            | -            | 26           | 0          | -             | -            | -            |
|    |                  | No chemo SOFT    | 13            | 0          | -             | -            | -            | 17           | 1          | -             | -            | -            |
|    |                  | Chemo TEXT       | 141           | 14         | 91.4          | 85.0         | 95.2         | 135          | 11         | 91.3          | 84.8         | 95.1         |
|    | Unknown/Not done | Prior chemo SOFT | 117           | 19         | 84.5          | 75.7         | 90.3         | 102          | 4          | 95.3          | 88.0         | 98.2         |
|    |                  | Overall          | 37            | 4          | -             | -            | -            | 40           | 4          | -             | -            | -            |
|    |                  | No chemo TEXT    | 7             | 0          | -             | -            | -            | 2            | 0          | -             | -            | -            |
|    |                  | No chemo SOFT    | 10            | 0          | -             | -            | -            | 11           | 2          | -             | -            | -            |
|    |                  | Chemo TEXT       | 4             | 0          | -             | -            | -            | 10           | 1          | -             | -            | -            |
|    | Prior chemo SOFT | 16               | 4             | -          | -             | -            | 17           | 1            | -          | -             | -            |              |

**Table S6.** Sites of first disease-free survival (DFS) event after a median follow-up of 9 years in the combined SOFT and TEXT population. Values are number and percent of patients. (A) denominator is all patients; (B) denominator is patients who had a DFS event. (C) Deaths without preceding cancer event.

| A.                                   | Cohort           |       |                  |       |               |       |                     |       | Treatment Assignment |       |                  |       | Overall |       |
|--------------------------------------|------------------|-------|------------------|-------|---------------|-------|---------------------|-------|----------------------|-------|------------------|-------|---------|-------|
|                                      | No chemo<br>TEXT |       | No chemo<br>SOFT |       | Chemo<br>TEXT |       | Prior chemo<br>SOFT |       | Exemestane-<br>OS    |       | Tamoxifen-<br>OS |       |         |       |
| <i>No. of patients</i>               | 1053             | 100.0 | 943              | 100.0 | 1607          | 100.0 | 1087                | 100.0 | 2346                 | 100.0 | 2344             | 100.0 | 4690    | 100.0 |
| <b>DFS event</b>                     |                  |       |                  |       |               |       |                     |       |                      |       |                  |       |         |       |
| No                                   | 947              | 89.9  | 861              | 91.3  | 1303          | 81.1  | 859                 | 79.0  | 2028                 | 86.4  | 1942             | 82.8  | 3970    | 84.6  |
| Yes                                  | 106              | 10.1  | 82               | 8.7   | 304           | 18.9  | 228                 | 21.0  | 318                  | 13.6  | 402              | 17.2  | 720     | 15.4  |
| <b>Site of DFS event</b>             |                  |       |                  |       |               |       |                     |       |                      |       |                  |       |         |       |
| No event                             | 947              | 89.9  | 861              | 91.3  | 1303          | 81.1  | 859                 | 79.0  | 2028                 | 86.4  | 1942             | 82.8  | 3970    | 84.6  |
| Local                                | 22               | 2.1   | 13               | 1.4   | 33            | 2.1   | 22                  | 2.0   | 42                   | 1.8   | 48               | 2.0   | 90      | 1.9   |
| Contralateral breast ± above         | 11               | 1.0   | 20               | 2.1   | 18            | 1.1   | 6                   | 0.6   | 22                   | 0.9   | 33               | 1.4   | 55      | 1.2   |
| Regional ± above                     | 9                | 0.9   | 8                | 0.8   | 20            | 1.2   | 14                  | 1.3   | 13                   | 0.6   | 38               | 1.6   | 51      | 1.1   |
| Soft tissue / distant LN ± above     | 2                | 0.2   | 1                | 0.1   | 8             | 0.5   | 2                   | 0.2   | 6                    | 0.3   | 7                | 0.3   | 13      | 0.3   |
| Bone ± above                         | 17               | 1.6   | 6                | 0.6   | 71            | 4.4   | 78                  | 7.2   | 81                   | 3.5   | 91               | 3.9   | 172     | 3.7   |
| Viscera ± above                      | 16               | 1.5   | 8                | 0.8   | 111           | 6.9   | 82                  | 7.5   | 93                   | 4.0   | 124              | 5.3   | 217     | 4.6   |
| Second (non-breast) malignancy       | 27               | 2.6   | 22               | 2.3   | 30            | 1.9   | 23                  | 2.1   | 52                   | 2.2   | 50               | 2.1   | 102     | 2.2   |
| Death without preceding cancer event | 2                | 0.2   | 3                | 0.3   | 7             | 0.4   | -                   | -     | 4                    | 0.2   | 8                | 0.3   | 12      | 0.3   |
| Death, recurrence suspected          | -                | -     | 1                | 0.1   | -             | -     | 1                   | 0.1   | 2                    | 0.1   | -                | -     | 2       | 0.0   |
| Death, no recurrence information     | -                | -     | -                | -     | 6             | 0.4   | -                   | -     | 3                    | 0.1   | 3                | 0.1   | 6       | 0.1   |

| B.                                       | Cohort           |       |                  |       |               |       |                     |       | Treatment Assignment |       |                  |       | Overall |       |
|------------------------------------------|------------------|-------|------------------|-------|---------------|-------|---------------------|-------|----------------------|-------|------------------|-------|---------|-------|
|                                          | No chemo<br>TEXT |       | No chemo<br>SOFT |       | Chemo<br>TEXT |       | Prior chemo<br>SOFT |       | Exemestane-<br>OS    |       | Tamoxifen-<br>OS |       |         |       |
| <i>No. of patients having DFS events</i> | 106              | 100.0 | 82               | 100.0 | 304           | 100.0 | 228                 | 100.0 | 318                  | 100.0 | 402              | 100.0 | 720     | 100.0 |
| <b>Site of first DFS event</b>           |                  |       |                  |       |               |       |                     |       |                      |       |                  |       |         |       |
| Local                                    | 22               | 20.8  | 13               | 15.9  | 33            | 10.9  | 22                  | 9.6   | 42                   | 13.2  | 48               | 11.9  | 90      | 12.5  |
| Contralateral breast ± above             | 11               | 10.4  | 20               | 24.4  | 18            | 5.9   | 6                   | 2.6   | 22                   | 6.9   | 33               | 8.2   | 55      | 7.6   |
| Regional ± above                         | 9                | 8.5   | 8                | 9.8   | 20            | 6.6   | 14                  | 6.1   | 13                   | 4.1   | 38               | 9.5   | 51      | 7.1   |
| Soft tissue / distant LN ± above         | 2                | 1.9   | 1                | 1.2   | 8             | 2.6   | 2                   | 0.9   | 6                    | 1.9   | 7                | 1.7   | 13      | 1.8   |
| Bone ± above                             | 17               | 16.0  | 6                | 7.3   | 71            | 23.4  | 78                  | 34.2  | 81                   | 25.5  | 91               | 22.6  | 172     | 23.9  |
| Viscera ± above                          | 16               | 15.1  | 8                | 9.8   | 111           | 36.5  | 82                  | 36.0  | 93                   | 29.2  | 124              | 30.8  | 217     | 30.1  |
| Second (non-breast) malignancy           | 27               | 25.5  | 22               | 26.8  | 30            | 9.9   | 23                  | 10.1  | 52                   | 16.4  | 50               | 12.4  | 102     | 14.2  |
| Death without preceding cancer event     | 2                | 1.9   | 3                | 3.7   | 7             | 2.3   | -                   | -     | 4                    | 1.3   | 8                | 2.0   | 12      | 1.7   |
| Death, recurrence suspected              | -                | -     | 1                | 1.2   | -             | -     | 1                   | 0.4   | 2                    | 0.6   | -                | -     | 2       | 0.3   |
| Death, no recurrence information         | -                | -     | -                | -     | 6             | 2.0   | -                   | -     | 3                    | 0.9   | 3                | 0.7   | 6       | 0.8   |

OS denotes ovarian suppression; LN denotes lymph nodes

| <b>C Treatment Assignment</b> | <b>Cohort</b> | <b>Oral ET Duration (mos)</b> | <b>Ovarian Suppression (mos)</b> | <b>Overall Survival (mos)</b> | <b>Cause of Death</b>                   |
|-------------------------------|---------------|-------------------------------|----------------------------------|-------------------------------|-----------------------------------------|
| Tamoxifen-OS                  | TEXT No chemo | 0                             | 2†                               | 139                           | Suicide                                 |
| Tamoxifen-OS                  | TEXT Chemo    | 60                            | 6†                               | 88                            | Suicide                                 |
| Tamoxifen-OS                  | TEXT Chemo    | 11                            | 11                               | 11                            | Other infection; Surgical complications |
| Tamoxifen-OS                  | TEXT Chemo    | 60                            | 58†                              | 70                            | Diabetes                                |
| Tamoxifen-OS                  | TEXT No chemo | 60                            | 61                               | 61                            | Accident                                |
| Tamoxifen-OS                  | TEXT Chemo    | 13                            | 10†                              | 18                            | Other – Diphenhydramine intoxication    |
| Tamoxifen-OS                  | SOFT No chemo | 0                             | 0                                | 64                            | Unknown (confirmed)                     |
| Tamoxifen-OS                  | TEXT Chemo    | 18                            | 22                               | 23                            | Unknown (confirmed)                     |
| Exemestane-OS                 | TEXT Chemo    | 24                            | 25                               | 64                            | Cerebrovascular accident                |
| Exemestane-OS                 | TEXT Chemo    | 62                            | 62                               | 103                           | Congestive heart failure                |
| Exemestane-OS                 | SOFT No chemo | 22                            | 22                               | 23                            | Cirrhosis                               |
| Exemestane-OS                 | SOFT No chemo | 6                             | 7                                | 8                             | Unknown (confirmed)                     |

Notes: ET denotes endocrine therapy; OS ovarian function suppression. †4 patients underwent oophorectomy after use of triptorelin; each other patient had triptorelin as only method of OS. In cases of unknown cause (confirmed) of death, the absence of preceding cancer event was confirmed.

**Table S7.** Status of death relative to site of first disease-free survival (DFS) event, according to cohort and treatment assignment, after a median follow-up in the combined SOFT and TEXT population of 9 years.

|                                      | <b>Cohort</b>        |       |                      |       |                   |       |                         |       | <b>Treatment Assignment</b> |       |                      |       | <b>Overall</b> |       |
|--------------------------------------|----------------------|-------|----------------------|-------|-------------------|-------|-------------------------|-------|-----------------------------|-------|----------------------|-------|----------------|-------|
|                                      | <b>No chemo TEXT</b> |       | <b>No chemo SOFT</b> |       | <b>Chemo TEXT</b> |       | <b>Prior chemo SOFT</b> |       | <b>Exemestane -OS</b>       |       | <b>Tamoxifen -OS</b> |       |                |       |
|                                      | N                    | %     | N                    | %     | N                 | %     | N                       | %     | N                           | %     | N                    | %     | N              | %     |
| <i>N Patients who died</i>           | 26                   | 100.0 | 19                   | 100.0 | 157               | 100.0 | 118                     | 100.0 | 158                         | 100.0 | 162                  | 100.0 | 320            | 100.0 |
| <b>Status of Death</b>               |                      |       |                      |       |                   |       |                         |       |                             |       |                      |       |                |       |
| After breast cancer event            | 21                   | 80.8  | 10                   | 52.6  | 134               | 85.4  | 112                     | 94.9  | 134                         | 84.8  | 143                  | 88.3  | 277            | 86.6  |
| After second (non-breast) malignancy | 3                    | 11.5  | 5                    | 26.3  | 11                | 7.0   | 5                       | 4.2   | 16                          | 10.1  | 8                    | 4.9   | 24             | 7.5   |
| Without preceding cancer event       | 2                    | 7.7   | 3                    | 15.8  | 7                 | 4.5   | -                       | -     | 4                           | 2.5   | 8                    | 4.9   | 12             | 3.8   |
| Incomplete information               | -                    | -     | 1                    | 5.3   | 5                 | 3.2   | 1                       | 0.8   | 4                           | 2.5   | 3                    | 1.9   | 7              | 2.2   |

**Table S8.** Final status of protocol-assigned treatment, overall and according to cohort and treatment assignment, for the combined SOFT and TEXT population.

| Status of Protocol-assigned Treatment                | Cohort           |       |                  |       |               |       |                     |       | Treatment Assignment |       |                  |       | Overall |       |
|------------------------------------------------------|------------------|-------|------------------|-------|---------------|-------|---------------------|-------|----------------------|-------|------------------|-------|---------|-------|
|                                                      | No chemo<br>TEXT |       | No chemo<br>SOFT |       | Chemo<br>TEXT |       | Prior chemo<br>SOFT |       | Exemestane<br>-OS    |       | Tamoxifen<br>-OS |       |         |       |
|                                                      | N                | %     | N                | %     | N             | %     | N                   | %     | N                    | %     | N                | %     | N       | %     |
| <i>No. of Patients</i>                               | 1053             | 100.0 | 943              | 100.0 | 1607          | 100.0 | 1087                | 100.0 | 2346                 | 100.0 | 2344             | 100.0 | 4690    | 100.0 |
| <b>Status of protocol-assigned treatment overall</b> |                  |       |                  |       |               |       |                     |       |                      |       |                  |       |         |       |
| Last known on protocol-assigned treatment            | -                | -     | 3                | 0.3   | 2             | 0.1   | 10                  | 0.9   | 8                    | 0.3   | 7                | 0.3   | 15      | 0.3   |
| Completed protocol treatment as assigned             | 896              | 85.1  | 753              | 79.9  | 1370          | 85.3  | 909                 | 83.6  | 1901                 | 81.0  | 2027             | 86.5  | 3928    | 83.8  |
| Stopped all protocol-assigned treatment early        | 150              | 14.2  | 173              | 18.3  | 220           | 13.7  | 160                 | 14.7  | 408                  | 17.4  | 295              | 12.6  | 703     | 15.0  |
| Never started protocol-assigned treatment            | 7                | 0.7   | 14               | 1.5   | 15            | 0.9   | 8                   | 0.7   | 29                   | 1.2   | 15               | 0.6   | 44      | 0.9   |
| <b>Status of protocol-assigned oral ET</b>           |                  |       |                  |       |               |       |                     |       |                      |       |                  |       |         |       |
| Last know on assigned oral ET                        | -                | -     | 3                | 0.3   | 1             | 0.1   | 9                   | 0.8   | 6                    | 0.3   | 7                | 0.3   | 13      | 0.3   |
| Completed assigned oral ET                           | 823              | 78.2  | 694              | 73.6  | 1219          | 75.9  | 823                 | 75.7  | 1716                 | 73.1  | 1843             | 78.6  | 3559    | 75.9  |
| Stopped assigned oral ET early                       | 211              | 20.0  | 228              | 24.2  | 326           | 20.3  | 242                 | 22.3  | 555                  | 23.7  | 452              | 19.3  | 1007    | 21.5  |
| Never started assigned oral ET                       | 19               | 1.8   | 18               | 1.9   | 61            | 3.8   | 13                  | 1.2   | 69                   | 2.9   | 42               | 1.8   | 111     | 2.4   |
| <b>Status of induced ovarian suppression</b>         |                  |       |                  |       |               |       |                     |       |                      |       |                  |       |         |       |
| Last known on GnRH agonist                           | 2                | 0.2   | 6                | 0.6   | 3             | 0.2   | 11                  | 1.0   | 13                   | 0.6   | 9                | 0.4   | 22      | 0.5   |
| Completed OS                                         | 852              | 80.9  | 697              | 73.9  | 1321          | 82.2  | 849                 | 78.1  | 1872                 | 79.8  | 1847             | 78.8  | 3719    | 79.3  |
| Stopped GnRH agonist early                           | 192              | 18.2  | 216              | 22.9  | 268           | 16.7  | 214                 | 19.7  | 430                  | 18.3  | 460              | 19.6  | 890     | 19.0  |
| Never started OS                                     | 7                | 0.7   | 24               | 2.5   | 15            | 0.9   | 13                  | 1.2   | 31                   | 1.3   | 28               | 1.2   | 59      | 1.3   |

Notes: ET denotes endocrine therapy.

OS: ovarian function suppression was GnRH agonist (triptorelin) intramuscular injection every 28 days, bilateral oophorectomy or bilateral ovarian irradiation. In SOFT the choice of GnRH agonist, bilateral oophorectomy or bilateral ovarian irradiation was by patient preference and patients who began with GnRH agonist could opt to undergo ovarian surgery or irradiation at any time. In TEXT, OS began with GnRH agonist for at least 6 months, after which patients could opt to undergo ovarian surgery or irradiation at any time. In total 16.6% of patients opted to undergo bilateral oophorectomy or bilateral ovarian irradiation at some point during adjuvant therapy.

Protocol-assigned endocrine therapy continued for 5 years from the date of randomization, and the protocol did not address the issue of extended adjuvant endocrine therapy beyond 5 years.

### III. D. Confidence Intervals for Targeted Adverse Events

**Table S9.** Targeted Adverse Events Reported During Treatment, According to Treatment Assignment, with 95% confidence intervals.\*

| Adverse Event                         | Tamoxifen (N=1005) |      |             |                    |      |             | Tamoxifen plus Ovarian Suppression (N=2326) |      |             |                    |      |             | Exemestane plus Ovarian Suppression (N=2317) |      |             |                    |      |             |
|---------------------------------------|--------------------|------|-------------|--------------------|------|-------------|---------------------------------------------|------|-------------|--------------------|------|-------------|----------------------------------------------|------|-------------|--------------------|------|-------------|
|                                       | Any Event          |      |             | Grade 3 or 4 Event |      |             | Any Event                                   |      |             | Grade 3 or 4 Event |      |             | Any Event                                    |      |             | Grade 3 or 4 Event |      |             |
|                                       | no.                | pts  | % (95% CI)  | no.                | pts  | % (95% CI)  | no.                                         | pts  | % (95% CI)  | no.                | pts  | % (95% CI)  | no.                                          | pts  | % (95% CI)  | no.                | pts  | % (95% CI)  |
| Allergic reaction or hypersensitivity | 35                 | 3.5  | (2.4-4.8)   | 2                  | 0.2  | (0.0-0.7)   | 110                                         | 4.7  | (3.9-5.7)   | 9                  | 0.4  | (0.2-0.7)   | 122                                          | 5.3  | (4.4-6.3)   | 12                 | 0.5  | (0.3-0.9)   |
| Injection-site reaction               | 4                  | 0.4  | (0.1-1.0)   | 0                  | 0    | –           | 189                                         | 8.1  | (7.0-9.3)   | 1                  | 0.0  | (0.0-0.2)   | 174                                          | 7.5  | (6.5-8.7)   | 1                  | 0.0  | (0.0-0.2)   |
| Hot flushes                           | 808                | 80.4 | (77.8-82.8) | 78                 | 7.8  | (6.2-9.6)   | 2175                                        | 93.5 | (92.4-94.5) | 284                | 12.2 | (10.9-13.6) | 2141                                         | 92.4 | (91.2-93.5) | 234                | 10.1 | (8.9-11.4)  |
| Depression                            | 476                | 47.4 | (44.2-50.5) | 41                 | 4.1  | (2.9-5.5)   | 1195                                        | 51.4 | (49.3-53.4) | 108                | 4.6  | (3.8-5.6)   | 1197                                         | 51.7 | (49.6-53.7) | 95                 | 4.1  | (3.3-5.0)   |
| Sweating                              | 492                | 49.0 | (45.8-52.1) | –                  | –    | –           | 1391                                        | 59.8 | (57.8-61.8) | –                  | –    | –           | 1286                                         | 55.5 | (53.5-57.5) | –                  | –    | –           |
| Insomnia                              | 470                | 46.8 | (43.6-49.9) | 30                 | 3.0  | (2.0-4.2)   | 1383                                        | 59.5 | (57.4-61.5) | 105                | 4.5  | (3.7-5.4)   | 1375                                         | 59.3 | (57.3-61.4) | 89                 | 3.8  | (3.1-4.7)   |
| Fatigue                               | 612                | 60.9 | (57.8-63.9) | 34                 | 3.4  | (2.4-4.7)   | 1496                                        | 64.3 | (62.3-66.3) | 70                 | 3.0  | (2.4-3.8)   | 1450                                         | 62.6 | (60.6-64.6) | 75                 | 3.2  | (2.6-4.0)   |
| Hypertension                          | 181                | 18.0 | (15.7-20.5) | 57                 | 5.7  | (4.3-7.3)   | 550                                         | 23.6 | (21.9-25.4) | 188                | 8.1  | (7.0-9.3)   | 564                                          | 24.3 | (22.6-26.1) | 168                | 7.3  | (6.2-8.4)   |
| Cardiac ischemia or infarction**      | 5                  | 0.5  | (0.2-1.2)   | 4                  | 0.4  | (0.1-1.0)   | 10                                          | 0.4  | (0.2-0.8)   | 6                  | 0.3  | (0.1-0.6)   | 17                                           | 0.7  | (0.4-1.2)   | 7                  | 0.3  | (0.1-0.6)   |
| Thrombosis or embolism                | 22                 | 2.2  | (1.4-3.3)   | 17                 | 1.7  | (1.0-2.7)   | 53                                          | 2.3  | (1.7-3.0)   | 47                 | 2.0  | (1.5-2.7)   | 27                                           | 1.2  | (0.8-1.7)   | 20                 | 0.9  | (0.5-1.3)   |
| Nausea                                | 241                | 24.0 | (21.4-26.7) | 0                  | 0    | –           | 692                                         | 29.8 | (27.9-31.7) | 14                 | 0.6  | (0.3-1.0)   | 747                                          | 32.2 | (30.3-34.2) | 17                 | 0.7  | (0.4-1.2)   |
| Musculoskeletal symptoms              | 703                | 70.0 | (67.0-72.8) | 67                 | 6.7  | (5.2-8.4)   | 1809                                        | 77.8 | (76.0-79.4) | 132                | 5.7  | (4.8-6.7)   | 2082                                         | 89.9 | (88.6-91.1) | 263                | 11.4 | (10.1-12.7) |
| Osteoporosis                          | 138                | 13.7 | (11.7-16.0) | 1                  | 0.1  | (0.0-0.6)   | 648                                         | 27.9 | (26.0-29.7) | 7                  | 0.3  | (0.1-0.6)   | 977                                          | 42.2 | (40.1-44.2) | 10                 | 0.4  | (0.2-0.8)   |
| Fractures                             | 53                 | 5.3  | (4.0-6.8)   | 8                  | 0.8  | (0.3-1.6)   | 140                                         | 6.0  | (5.1-7.1)   | 23                 | 1.0  | (0.6-1.5)   | 179                                          | 7.7  | (6.7-8.9)   | 37                 | 1.6  | (1.1-2.2)   |
| Vaginal dryness                       | 426                | 42.4 | (39.3-45.5) | –                  | –    | –           | 1144                                        | 49.2 | (47.1-51.2) | –                  | –    | –           | 1245                                         | 53.7 | (51.7-55.8) | –                  | –    | –           |
| Libido decrease                       | 434                | 43.2 | (40.1-46.3) | –                  | –    | –           | 981                                         | 42.2 | (40.2-44.2) | –                  | –    | –           | 1056                                         | 45.6 | (43.5-47.6) | –                  | –    | –           |
| Dyspareunia                           | 242                | 24.1 | (21.5-26.8) | 16                 | 1.6  | (0.9-2.6)   | 636                                         | 27.3 | (25.5-29.2) | 35                 | 1.5  | (1.1-2.1)   | 733                                          | 31.6 | (29.7-33.6) | 56                 | 2.4  | (1.8-3.1)   |
| Urinary incontinence                  | 166                | 16.5 | (14.3-19.0) | 6                  | 0.6  | (0.2-1.3)   | 433                                         | 18.6 | (17.1-20.3) | 9                  | 0.4  | (0.2-0.7)   | 317                                          | 13.7 | (12.3-15.1) | 9                  | 0.4  | (0.2-0.7)   |
| CNS cerebrovascular ischemia          | 6                  | 0.6  | (0.2-1.3)   | 4                  | 0.4  | (0.1-1.0)   | 10                                          | 0.4  | (0.2-0.8)   | 7                  | 0.3  | (0.1-0.6)   | 6                                            | 0.3  | (0.1-0.6)   | 5                  | 0.2  | (0.1-0.5)   |
| CNS hemorrhage                        | 15                 | 1.5  | (0.8-2.4)   | 0                  | 0    | –           | 26                                          | 1.1  | (0.7-1.6)   | 2                  | 0.1  | (0.0-0.3)   | 19                                           | 0.8  | (0.5-1.3)   | 1                  | 0.0  | (0.0-0.2)   |
| Glucose intolerance†                  | 18                 | 1.8  | (1.1-2.8)   | 4                  | 0.4  | (0.1-1.0)   | 68                                          | 2.9  | (2.3-3.7)   | 23                 | 1.0  | (0.6-1.5)   | 63                                           | 2.7  | (2.1-3.5)   | 15                 | 0.6  | (0.4-1.1)   |
| Hyperglycemia†                        | 20                 | 2.0  | (1.2-3.1)   | 1                  | 0.1  | (0.0-0.6)   | 92                                          | 4.0  | (3.2-4.8)   | 20                 | 0.9  | (0.5-1.3)   | 71                                           | 3.1  | (2.4-3.8)   | 14                 | 0.6  | (0.3-1.0)   |
| Any targeted adverse event            | 962                | 95.7 | (94.3-96.9) | 247                | 24.6 | (21.9-27.4) | 2295                                        | 98.7 | (98.1-99.1) | 721                | 31.0 | (29.1-32.9) | 2288                                         | 98.7 | (98.2-99.2) | 748                | 32.3 | (30.4-34.2) |

\*Data are for patients in the safety populations in SOFT and TEXT who initiated a protocol-assigned treatment, including: 1005 patients who were randomly assigned to receive tamoxifen in SOFT, and 4643 patients who were randomly assigned to receive tamoxifen plus ovarian suppression (2326 patients) or exemestane plus ovarian suppression (2317) in SOFT or TEXT. Data are missing for 4 patients (1 in the tamoxifen group and 3 in the tamoxifen plus ovarian suppression group) who initiated treatment but withdrew consent within 1 month after randomization and for whom no adverse-event data were submitted. Targeted adverse events and other adverse events of grade 3 or higher were categorized according to the Common Terminology Criteria for Adverse Events (CTCAE), version 3.0. CNS denotes central nervous system, and a dash indicates that grade 3 or 4 was not possible grades for the specified AE.

\*\*One patient in the tamoxifen group in SOFT had grade 5 cardiac ischemia or infarction; no other grade 5 targeted AEs were reported.

†Glucose intolerance (diabetes) and hyperglycemia were added as targeted adverse events in 2011 and therefore may be underreported.

### III. E. SOFT + TEXT Combined Analysis and ABCSG-12

**Table S10.** Features of the SOFT+TEXT Combined Analysis Population and ABCSG-12 Trial in Premenopausal Hormone-Receptor Positive Breast Cancer Comparing Adjuvant Aromatase Inhibitor (AI) Plus Ovarian Suppression versus Tamoxifen (Tam) Plus Ovarian Suppression.

| Feature                                  | Trial                                                                                                                                                                                                                                      |                                                                                                                                                                                                                               |
|------------------------------------------|--------------------------------------------------------------------------------------------------------------------------------------------------------------------------------------------------------------------------------------------|-------------------------------------------------------------------------------------------------------------------------------------------------------------------------------------------------------------------------------|
|                                          | SOFT+TEXT<br>Combined Analysis                                                                                                                                                                                                             | ABCSG-12 <sup>3</sup>                                                                                                                                                                                                         |
| Patients in analysis                     | 4,690                                                                                                                                                                                                                                      | 1,803                                                                                                                                                                                                                         |
| Median age at randomization              | 43 years                                                                                                                                                                                                                                   | 45 years                                                                                                                                                                                                                      |
| Young patients                           | 28% < age 40 years AI group<br>26% < age 40 years Tam group                                                                                                                                                                                | 25% ≤ age 40 years AI group<br>21% ≤ age 40 years Tam group                                                                                                                                                                   |
| Premenopausal status determination       | Defined by regular menses without exogenous hormones during the prior 6 months and/or E2 level in the premenopausal range; patients who had completed chemotherapy prior to entry into SOFT were required to have a premenopausal E2 level | Defined by a clinically-estimated regular menstrual cycle or a last menstrual cycle occurring not more than 1 year before study entry; if indeterminate menstrual status (eg, post-hysterectomy), serum FSH and LH were used. |
| Lymph node negative                      | 58%                                                                                                                                                                                                                                        | 67%*                                                                                                                                                                                                                          |
| Tumor size ≤ 2 cm                        | 62%                                                                                                                                                                                                                                        | 76%                                                                                                                                                                                                                           |
| No Chemotherapy                          | 43%                                                                                                                                                                                                                                        | 85% ¥                                                                                                                                                                                                                         |
| Chemotherapy                             | 57%                                                                                                                                                                                                                                        | 5% ¥                                                                                                                                                                                                                          |
| Duration trial therapy                   | 5 years                                                                                                                                                                                                                                    | 3 years                                                                                                                                                                                                                       |
| AI studied                               | exemestane                                                                                                                                                                                                                                 | anastrozole                                                                                                                                                                                                                   |
| GnRH agonist ovarian suppression studied | triptorelin                                                                                                                                                                                                                                | goserelin                                                                                                                                                                                                                     |
| Bisphosphonate therapy                   | Allowed if T-score ≤ 1.5 or if co-enrolled in randomized trial of bisphosphonate                                                                                                                                                           | 50% Randomized to zoledronate<br>50% Randomized to no zoledronate                                                                                                                                                             |
| Median follow-up                         | 9 years                                                                                                                                                                                                                                    | 7.9 years                                                                                                                                                                                                                     |
| DFS events                               | 720                                                                                                                                                                                                                                        | 251                                                                                                                                                                                                                           |
| Deaths                                   | 320                                                                                                                                                                                                                                        | 86                                                                                                                                                                                                                            |

E2 denotes estradiol, FSH follicle-stimulating hormone, LH luteinizing hormone, GnRH gonadotropin-releasing hormone.

\*Missing data in 2% of patients; lymph node-positive limited to <10 positive nodes.

¥ Missing data in 9% of patients; all chemotherapy use was pre-operative.
